# Supplementary material for: Ni(2,2′:6′,2′′-terpyridine)2: a high-spin octahedral formal Ni(0) complex
Source: Royal Society of Chemistry journal article supplement (doi:10.1039/d3dt04247b), 2024-01-01
Supplement: d3dt04247b1.pdf [file d3dt04247b1.pdf]

## SUPPORTING INFORMATION

### **Ni(2,2':6',2''-terpyridine)<sub>2</sub>: A high-spin octahedral formal Ni(0) complex**

*Natalia Cabrera-Lobera,<sup>a</sup> Estefanía del Horno,<sup>a</sup> M. Teresa Quirós,<sup>b</sup> Elena Buñuel,<sup>a</sup> Magali Gimeno,<sup>c,d</sup> William W. Brennessel,<sup>c</sup> Michael L. Neidig,<sup>d</sup> José Luis Priego,<sup>d</sup> and Diego J. Cárdenas,<sup>\*a</sup>*

<sup>a</sup>*Department of Organic Chemistry, Facultad de Ciencias Universidad Autónoma de Madrid, Institute for Advanced Research in Chemical Sciences (IAdChem), Red ORFEO-CINQA, Av. Francisco Tomás y Valiente 7, Campus de Cantoblanco, 28049, Madrid, Spain. E-mail: [diego.cardenas@uam.es](mailto:diego.cardenas@uam.es)*

<sup>b</sup>*Department of Organic Chemistry and Inorganic Chemistry, Facultad de Farmacia, Universidad de Alcalá de Henares, Campus Universitario, 28871, Madrid, Spain.*

<sup>c</sup>*Department of Chemistry, University of Rochester, Rochester, New York 14627.*

<sup>d</sup>*Inorganic Chemistry Laboratory, Department of Chemistry, University of Oxford, South Parks Road, Oxford OX1 3QR, United Kingdom.*

<sup>e</sup>*Department of Inorganic Chemistry, Universidad Complutense de Madrid, Ciudad Universitaria, 28040, Madrid, Spain.*

|                                             |           |
|---------------------------------------------|-----------|
| <b>1. Experimental results</b>              | <b>S2</b> |
| <b>2. Computational results</b>             |           |
| <b>Computational methods</b>                | <b>S7</b> |
| <b>Atomic coordinates and energy values</b> | <b>S9</b> |

## 1. Experimental results

### Synthesis of complex 1

In a glove-box, a mixture of  $\text{Ni}(\text{cod})_2$  (74 mg, 0.27 mmol) and terpyridine (125 mg, 0.57 mmol) were dissolved in toluene (3 mL) at room temperature. The resulting dark blue solution is stirred for 10 min, and pentane (5 mL) is added. The resulting precipitate is filtered to give a dark blue solid which is washed with pentane (76 mg, 54%). Crystals suitable for X-ray diffraction were obtained by vapor diffusion toluene/pentane at  $-25\text{ }^\circ\text{C}$  after 24 h. Elemental analysis calculated for  $\text{C}_{30}\text{H}_{22}\text{N}_6\text{Ni}$ : C 68.6 %, H 4.20 %, N 16 %. Found: C 69.04 %, H 3.99 %, N 15.51 %.

Carbon: 69.04 % (expected 68.6 %)

Hydrogen: 3.99 % (expected 4.2 %)

Nitrogen: 15.51 % (expected 16 %)

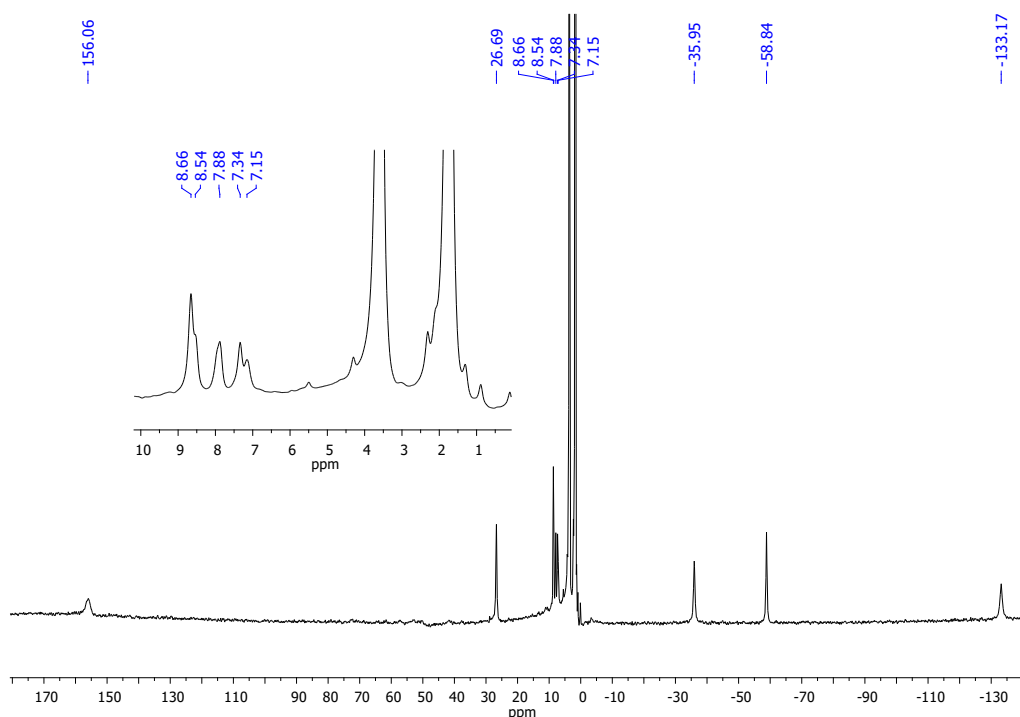

$^1\text{H-NMR}$  spectrum ( $d^8\text{-THF}$ , 400 MHz)

### Magnetic measurements in the solid state

The variable-temperature magnetic susceptibilities were measured on polycrystalline samples with a Quantum Design MPMSXL SQUID (Superconducting Quantum Interference Device) susceptometer over a temperature range of 2 to 300 K at the constant field of 0.5 T. All data

were corrected for the diamagnetic contribution of both the sample holder and the complex to the susceptibility. The molar diamagnetic corrections were calculated on the basis of Pascal constants.

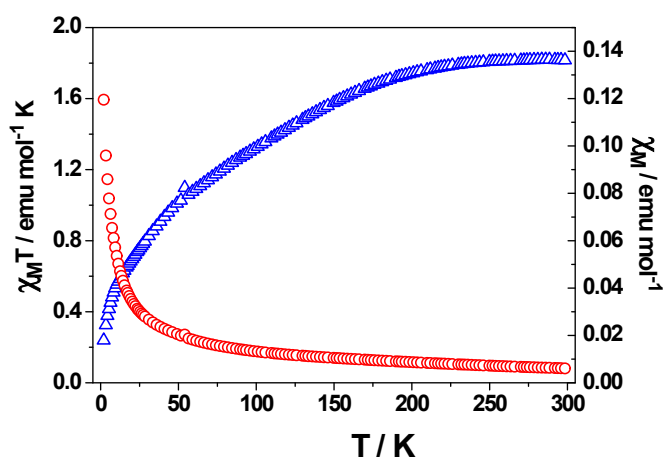

Temperature dependence of the molar susceptibility  $\chi_M$  (red circles) and  $\chi_M T$  (blue triangles) for solid  $\text{Ni}(\text{tpy})_2$  at 0.5 T.

#### Measurement of the effective magnetic moment of **1** in solution

A sealed tube with THF as internal standard was introduced in the NMR tube. Then, a solution of complex **1** in THF (0.5 mL) was added. The experiment was carried out at room temperature with the parameters described in Table S1.

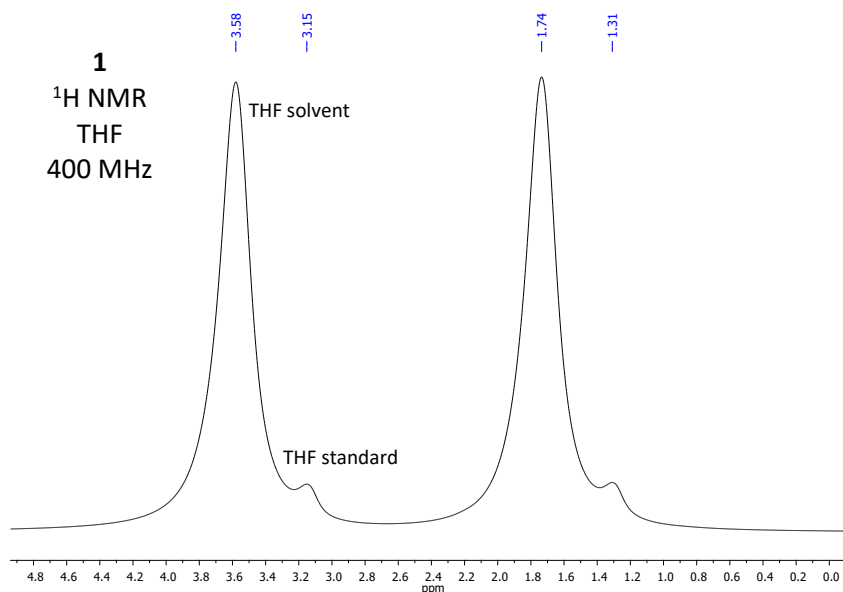

**Table S1.** Parameters used for the measurement of  $\mu_{\text{eff}}$

| Parameter                    | Value                |
|------------------------------|----------------------|
| temperature                  | 298                  |
| frequency shift in Hz        | 172.0559             |
| spectrometer frequency in Hz | 400130000            |
| concentration in moles/L     | 0.01396              |
| molecular weight in g/mol    | 525.2414             |
| diamagnetic susceptibility   | $-306 \cdot 10^{-6}$ |

Magnetic susceptibility:<sup>1</sup>  $\chi(\mathbf{1}) = 6 \cdot (-49 \cdot 10^{-6} \text{ (Py)}) + (-12 \cdot 10^{-6} \text{ (Ni)}) = -306 \cdot 10^{-6}$

Using a difference of 0.43 ppm of signals shift, we obtained a value of  $\mu_{\text{eff}} = 4.3$ . It could correspond to a S = 2 complex.

#### EPR signal for magnetically active S = ½ minor species (1%)

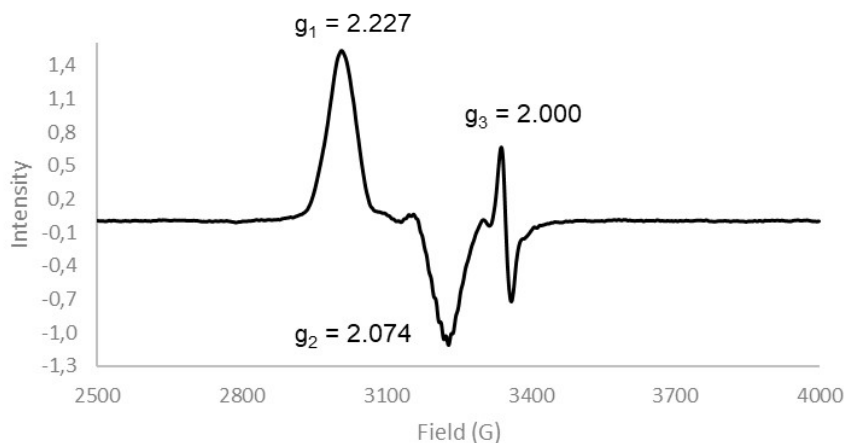

#### Crystal data for complex 1

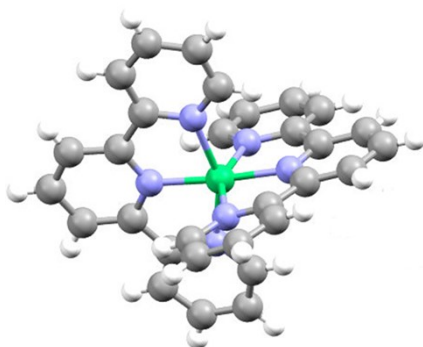

A crystal (0.589 x 0.041 x 0.026 mm<sup>3</sup>) was placed onto a thin glass optical fiber or a nylon loop and mounted on a XtaLab Synergy-S Dualflex diffractometer equipped with a HyPix- 6000HE HPC area detector for data collection at 172.99(10) K. A preliminary set of cell constants and an orientation matrix were calculated from a small sampling of reflections. A short pre-experiment was run, from which an optimal data collection strategy was determined. The full data collection was carried out using

a PhotonJet (Cu) X-ray Source with frame times of 7.09 and 28.37 seconds and a detector distance of 31.2 mm. Series of frames were collected in 0.50° steps in  $\omega$  at different  $2\theta$ ,  $\kappa$ , and  $\phi$  settings. After the intensity data were corrected for absorption, the final cell constants were calculated from the xyz centroids of 23899 strong reflections from the actual data collection after integration. See Table S2 for additional crystal and refinement information. The structure was solved using ShelXT and refined using ShelXL. The space group *Fdd2* was determined based on systematic absences and intensity statistics. Most or all non-hydrogen atoms were assigned from the solution. Full-matrix least squares / difference Fourier cycles were performed which located any remaining non-hydrogen atoms. All non-hydrogen atoms were refined with anisotropic displacement parameters. All hydrogen atoms were placed in ideal positions and refined as riding atoms with relative isotropic displacement parameters. The

<sup>1</sup> G. A. Bain, J. F. Berry, *J. Chem. Educ.* **2008**, *85*, 532–536.

final full matrix least squares refinement converged to  $R1 = 0.0327$  ( $F2$ ,  $I > 2\sigma(I)$ ) and  $wR2 = 0.0937$  ( $F2$ , all data). The structure is similar to the one suggested. The asymmetric unit contains two molecules in general positions. The structure is isomorphous with single crystal X-ray diffraction structures of Ti, Cr, V, Fe, Mo, Ru, and W analogs. Structure manipulation and figure generation were performed using Olex2. Unless noted otherwise all structural diagrams containing thermal displacement ellipsoids are drawn at the 50 % probability level.

**Table S2.** *Crystal data and structure refinement.*

|                                                                      |                                                                                                                              |
|----------------------------------------------------------------------|------------------------------------------------------------------------------------------------------------------------------|
| <b>Identification code</b>                                           | CCDC number 1891622                                                                                                          |
| <b>Empirical formula</b>                                             | $C_{30}H_{22}N_6Ni$                                                                                                          |
| <b>Formula weight</b>                                                | 525.24                                                                                                                       |
| <b>Temperature</b>                                                   | 172.99(10) K                                                                                                                 |
| <b>Wavelength</b>                                                    | 1.54184 Å                                                                                                                    |
| <b>Crystal system</b>                                                | orthorhombic                                                                                                                 |
| <b>Space group</b>                                                   | <i>Fdd2</i>                                                                                                                  |
| <b>Unit cell dimensions</b>                                          | $a = 56.2329(5)$ Å, $\alpha = 90^\circ$ $b = 39.4759(4)$ Å,<br>$\beta = 90^\circ$ , $c = 8.49770(10)$ Å, $\gamma = 90^\circ$ |
| <b>Volume</b>                                                        | 18863.6(3) Å <sup>3</sup>                                                                                                    |
| <b>Z</b>                                                             | 32                                                                                                                           |
| <b>Density (calculated)</b>                                          | 1.480 mg/m <sup>3</sup>                                                                                                      |
| <b>Absorption coefficient</b>                                        | 1.444 mm <sup>-1</sup>                                                                                                       |
| <b><i>F</i>(000)</b>                                                 | 8704                                                                                                                         |
| <b>Crystal color, morphology</b>                                     | blue-black, needle                                                                                                           |
| <b>Crystal size</b>                                                  | 0.589 x 0.041 x 0.026 mm <sup>3</sup>                                                                                        |
| <b>Theta range for data collection</b>                               | 2.735 to 77.880°                                                                                                             |
| <b>Index ranges</b>                                                  | $-70 \leq h \leq 64$ , $-50 \leq k \leq 50$ , $-10 \leq l \leq 6$                                                            |
| <b>Reflections collected</b>                                         | 31051                                                                                                                        |
| <b>Independent reflections</b>                                       | 6724 [ $R(\text{int}) = 0.0306$ ]                                                                                            |
| <b>Observed reflections</b>                                          | 6557                                                                                                                         |
| <b>Completeness to theta</b>                                         | 74.504° 99.9%                                                                                                                |
| <b>Absorption correction</b>                                         | Multi-scan                                                                                                                   |
| <b>Max. and min. transmission</b>                                    | 1.00000 and 0.71074                                                                                                          |
| <b>Refinement method</b>                                             | Full-matrix least-squares on $F^2$                                                                                           |
| <b>Data / restraints / parameters</b>                                | 6724 / 1 / 668                                                                                                               |
| <b>Goodness-of-fit on <math>F^2</math></b>                           | 1.060                                                                                                                        |
| <b>Final <math>R</math> indices [<math>I &gt; 2\sigma(I)</math>]</b> | $R1 = 0.0327$ , $wR2 = 0.0930$                                                                                               |
| <b><math>R</math> indices (all data)</b>                             | $R1 = 0.0334$ , $wR2 = 0.0937$                                                                                               |

Distances (Å) between pyridine ring centroids for  $M(\text{tpy})_2$  complexes ( $M = \text{Ni}, \text{Fe}, \text{Ru}$ )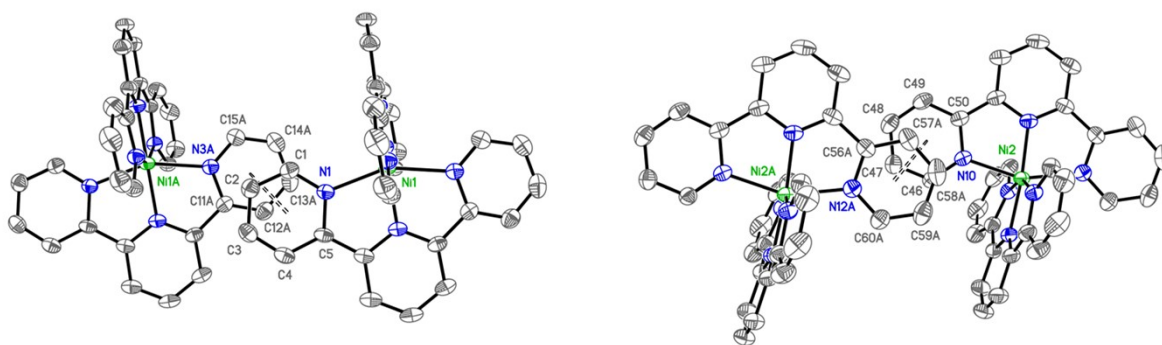

|                            | Ring N1-Ring N3 | Ring N4-Ring N6 |
|----------------------------|-----------------|-----------------|
| <b>Ni(tpy)<sub>2</sub></b> | 3.76            | 3.72            |
| <b>Fe(tpy)<sub>2</sub></b> | 3.73            | 3.69            |
| <b>Ru(tpy)<sub>2</sub></b> | 3.86            | 3.81            |

## 2. Computational results

### 2.1. Computational methods

Calculations were performed with Gaussian 09 at DFT level.<sup>2</sup> The geometries of complexes here reported were optimized using the M06-2X hybrid functional<sup>3</sup> that accounts for dispersive interactions. Optimizations were carried out using the standard 6-31G(d) basis set for C, H, and N. The LANL2DZ basis set, which includes the relativistic effective core potential (ECP) of Hay and Wadt and employs a split-valence (double- $\zeta$ ) basis set, was used for Ni.<sup>4</sup> Harmonic frequencies were calculated at the same level to characterize the stationary points and to determine the zero-point energies (ZPE) for the monomeric complex. Solvent effects were also considered for the monomeric species by performing optimizations in diisopropylether using the polarized continuum model (PCM).

Broken-symmetry calculations were used for the dimers in the singlet state by defining two fragments with opposite spin, either both triplets or both quintets. In these cases, frequency calculations were not performed and the reported energy values correspond to the energy minima

---

<sup>2</sup> Gaussian 09, Revision E.01, M. J. Frisch, G. W. Trucks, H. B. Schlegel, G. E. Scuseria, M. A. Robb, J. R. Cheeseman, G. Scalmani, V. Barone, B. Mennucci, G. A. Petersson, H. Nakatsuji, M. Caricato, X. Li, H. P. Hratchian, A. F. Izmaylov, J. Bloino, G. Zheng, J. L. Sonnenberg, M. Hada, M. Ehara, K. Toyota, R. Fukuda, J. Hasegawa, M. Ishida, T. Nakajima, Y. Honda, O. Kitao, H. Nakai, T. Vreven, J. A. Montgomery, Jr., J. E. Peralta, F. Ogliaro, M. Bearpark, J. J. Heyd, E. Brothers, K. N. Kudin, V. N. Staroverov, T. Keith, R. Kobayashi, J. Normand, K. Raghavachari, A. Rendell, J. C. Burant, S. S. Iyengar, J. Tomasi, M. Cossi, N. Rega, J. M. Millam, M. Klene, J. E. Knox, J. B. Cross, V. Bakken, C. Adamo, J. Jaramillo, R. Gomperts, R. E. Stratmann, O. Yazyev, A. J. Austin, R. Cammi, C. Pomelli, J. W. Ochterski, R. L. Martin, K. Morokuma, V. G. Zakrzewski, G. A. Voth, P. Salvador, J. J. Dannenberg, S. Dapprich, A. D. Daniels, O. Farkas, J. B. Foresman, J. V. Ortiz, J. Cioslowski, and D. J. Fox, Gaussian, Inc., Wallingford CT, 2013.

<sup>3</sup> Y. Zhao, D.G. Truhlar, *Theor Chem Account.* **2006**, *120*: 215–241.

<sup>4</sup> (a) A. D. Becke, *J. Chem. Phys.* **1993**, *98*, 5648- 5653. (b) A. D. Becke, *Phys. Rev. A* **1988**, *38*, 3098-3100. (c) C. Lee, W. Yang, R. G. Parr, *Phys. Rev. B* **1988**, *37*, 785-789.

<sup>4</sup> (a) L. Noodleman, *J. Chem. Phys.*,1981,**74**, 5737; (b) L. Noodleman, J. G. Norman, J. H. Osborne, A. Aizman and D. Case, *J. Am. Chem. Soc.*,1985, **107**, 3418; (c) L. Noodleman and E. R. Davidson, *Chem. Phys.*, 1986, **109**, 131; (d) L. Noodleman, D. A. Case and A. J. Aizman, *J. Am. Chem. Soc.*, 1988, **110**, 1001; (e) L. Noodleman, C. Y. Peng, D. A. Case and J. M. Monesca, *Coord. Chem. Rev.* 1995, **144**, 199.

**1.2. Atomic coordinates and energy values for single-point calculations and the stationary points**

Energy values for different spin states for complex **1** and the dimer

**M06-2x**

| <b>Ni(tpy)<sub>2</sub></b>                                |                           |                           |                                   |
|-----------------------------------------------------------|---------------------------|---------------------------|-----------------------------------|
| <i>Gas phase</i><br><i>E</i> (au)                         | S = 0, m = 1<br>(singlet) | S = 1, m = 3<br>(triplet) | S = 2, m = 5<br>(quintuplet)      |
|                                                           | -1653.665411              | -1653.711479              | -1653.735924                      |
| Relative <i>E</i><br>(kcal·mol <sup>-1</sup> )            | 0                         | -28.9                     | -44.2                             |
| <i>Gas phase</i><br><i>G</i> (au)                         | S = 0, m = 1<br>(singlet) | S = 1, m = 3<br>(triplet) | S = 2, m = 5<br>(quintuplet)      |
|                                                           | -1653.265043              | -1653.315780              | -1653.339548                      |
| Relative <i>E</i><br>(kcal·mol <sup>-1</sup> )            | 0                         | -31.8                     | -46.8                             |
| <i>Di(isopropyl)ether</i><br><i>E</i> (au)                | S = 0, m = 1<br>(singlet) | S = 1, m = 3<br>(triplet) | S = 2, m = 5<br>(quintuplet)      |
|                                                           | -1653.678994              | -1653.716068              | -1653.744597                      |
| Relative <i>E</i><br>(kcal·mol <sup>-1</sup> )            | 0                         | -23.3                     | -41.2                             |
| <i>Di(isopropyl)ether</i><br><i>G</i> (au)                | S = 0, m = 1<br>(singlet) | S = 1, m = 3<br>(triplet) | S = 2, m = 5<br>(quintuplet)      |
|                                                           | -1653.278160              | -1653.318266              | -1653.347544                      |
| Relative <i>E</i><br>(kcal·mol <sup>-1</sup> )            | 0                         | -25.2                     | -43.5                             |
| <b>[Ni(tpy)<sub>2</sub>]<sub>2</sub></b>                  |                           |                           |                                   |
| <i>Gas phase</i><br><i>E</i> (au)                         | S = 4<br>(nonaplet)       | S = 0<br>(two triplets)   | S = 0, m = 1<br>(two quintuplets) |
|                                                           | -3307.487585              | -3307.478443              | -3307.488473*                     |
| Relative <i>E</i><br>(kcal·mol <sup>-1</sup> )<br>SCF=XQC | 0                         | 5.7                       | -0.6*<br>+1,7                     |
| <i>Gas phase</i><br><i>G</i> (au)                         | S = 4<br>(nonaplet)       | S = 0<br>(two triplets)   | S = 0, m = 1<br>(two quintuplets) |
|                                                           | -3306.671326              | -3306.654013              | -3306.667585                      |
| Relative <i>G</i><br>(kcal·mol <sup>-1</sup> )<br>SCF=XQC | 0                         | 10.9                      | 2.3                               |
| (*) SCF=QC                                                |                           |                           |                                   |



## Single-point calculations on dimers found in the crystal structure

### Dimer I

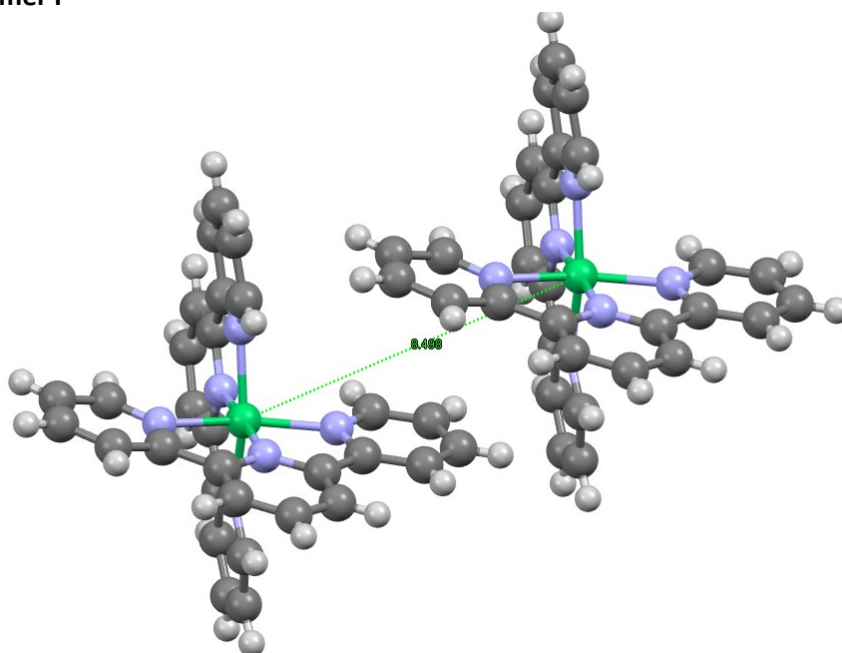

Nonaplet: E(UM062X) = -3306.769226

Singlet (two triplets): E(UM062X) = -3306.723548

Singlet (two quintets): E(UM062X) = -3306.762796

|    |           |           |           |
|----|-----------|-----------|-----------|
| Ni | 28.216545 | 13.858804 | 4.142374  |
| N  | 29.065661 | 14.445811 | 2.306361  |
| N  | 28.551130 | 15.794702 | 4.453815  |
| N  | 27.396669 | 14.185270 | 6.109846  |
| N  | 26.221964 | 13.723007 | 3.488646  |
| N  | 27.994987 | 11.902379 | 3.903928  |
| N  | 30.116654 | 13.083498 | 4.760666  |
| C  | 29.283283 | 13.687874 | 1.224689  |
| H  | 28.995370 | 12.783086 | 1.251626  |
| C  | 29.894534 | 14.131583 | 0.080473  |
| H  | 30.034554 | 13.550497 | -0.657807 |
| C  | 30.309533 | 15.482448 | 0.035435  |
| H  | 30.735216 | 15.829441 | -0.739725 |
| C  | 30.090225 | 16.282230 | 1.120422  |
| H  | 30.353395 | 17.194518 | 1.094164  |
| C  | 29.477849 | 15.765095 | 2.277214  |
| C  | 29.220302 | 16.502900 | 3.483972  |
| C  | 29.589752 | 17.837185 | 3.731170  |
| H  | 30.054236 | 18.335766 | 3.069454  |
| C  | 29.272036 | 18.414718 | 4.941328  |
| H  | 29.520023 | 19.315558 | 5.114681  |
| C  | 28.585432 | 17.680861 | 5.917118  |
| H  | 28.361625 | 18.073251 | 6.752952  |
| C  | 28.238475 | 16.364340 | 5.633550  |
| C  | 27.507448 | 15.467052 | 6.547563  |

|    |           |           |           |
|----|-----------|-----------|-----------|
| C  | 26.921501 | 15.866154 | 7.738006  |
| H  | 27.009787 | 16.765809 | 8.029987  |
| C  | 26.215216 | 14.968472 | 8.496935  |
| H  | 25.823835 | 15.233355 | 9.321127  |
| C  | 26.082506 | 13.663399 | 8.036955  |
| H  | 25.583720 | 13.022310 | 8.529481  |
| C  | 26.693758 | 13.321142 | 6.846852  |
| H  | 26.609971 | 12.427013 | 6.537026  |
| C  | 25.318301 | 14.723721 | 3.462473  |
| H  | 25.617460 | 15.606797 | 3.644664  |
| C  | 23.986706 | 14.531079 | 3.185533  |
| H  | 23.378266 | 15.260593 | 3.192076  |
| C  | 23.546965 | 13.231137 | 2.892872  |
| H  | 22.636554 | 13.070865 | 2.673121  |
| C  | 24.444442 | 12.192132 | 2.927203  |
| H  | 24.160465 | 11.309056 | 2.722578  |
| C  | 25.792907 | 12.442014 | 3.268045  |
| C  | 26.784855 | 11.419194 | 3.470461  |
| C  | 26.605472 | 10.048196 | 3.300677  |
| H  | 25.775474 | 9.710677  | 2.983797  |
| C  | 27.636783 | 9.185647  | 3.594697  |
| H  | 27.517570 | 8.249674  | 3.484227  |
| C  | 28.866597 | 9.686202  | 4.058247  |
| H  | 29.580192 | 9.098011  | 4.275108  |
| C  | 29.011678 | 11.052857 | 4.190811  |
| C  | 30.233056 | 11.733422 | 4.632691  |
| C  | 31.456122 | 11.086412 | 4.873516  |
| H  | 31.525288 | 10.143333 | 4.780721  |
| C  | 32.554350 | 11.829743 | 5.245205  |
| H  | 33.384348 | 11.403403 | 5.423232  |
| C  | 32.435699 | 13.202320 | 5.356525  |
| H  | 33.184721 | 13.733666 | 5.599474  |
| C  | 31.211509 | 13.787748 | 5.108817  |
| H  | 31.136719 | 14.731616 | 5.187421  |
| Ni | 28.216545 | 13.858804 | -4.355326 |
| N  | 29.065661 | 14.445811 | -6.191339 |
| N  | 28.551130 | 15.794702 | -4.043885 |
| N  | 27.396669 | 14.185270 | -2.387854 |
| N  | 26.221964 | 13.723007 | -5.009054 |
| N  | 27.994987 | 11.902379 | -4.593772 |
| N  | 30.116654 | 13.083498 | -3.737034 |
| C  | 29.283283 | 13.687874 | -7.273011 |
| H  | 28.995370 | 12.783086 | -7.246074 |
| C  | 29.894534 | 14.131583 | -8.417227 |
| H  | 30.034554 | 13.550497 | -9.155507 |
| C  | 30.309533 | 15.482448 | -8.462265 |
| H  | 30.735216 | 15.829441 | -9.237425 |
| C  | 30.090225 | 16.282230 | -7.377278 |
| H  | 30.353395 | 17.194518 | -7.403536 |
| C  | 29.477849 | 15.765095 | -6.220486 |
| C  | 29.220302 | 16.502900 | -5.013728 |
| C  | 29.589752 | 17.837185 | -4.766530 |

|   |           |           |           |
|---|-----------|-----------|-----------|
| H | 30.054236 | 18.335766 | -5.428246 |
| C | 29.272036 | 18.414718 | -3.556372 |
| H | 29.520023 | 19.315558 | -3.383019 |
| C | 28.585432 | 17.680861 | -2.580582 |
| H | 28.361625 | 18.073251 | -1.744748 |
| C | 28.238475 | 16.364340 | -2.864150 |
| C | 27.507448 | 15.467052 | -1.950137 |
| C | 26.921501 | 15.866154 | -0.759694 |
| H | 27.009787 | 16.765809 | -0.467713 |
| C | 26.215216 | 14.968472 | -0.000765 |
| H | 25.823835 | 15.233355 | 0.823427  |
| C | 26.082506 | 13.663399 | -0.460745 |
| H | 25.583720 | 13.022310 | 0.031781  |
| C | 26.693758 | 13.321142 | -1.650848 |
| H | 26.609971 | 12.427013 | -1.960674 |
| C | 25.318301 | 14.723721 | -5.035227 |
| H | 25.617460 | 15.606797 | -4.853036 |
| C | 23.986706 | 14.531079 | -5.312167 |
| H | 23.378266 | 15.260593 | -5.305624 |
| C | 23.546965 | 13.231137 | -5.604828 |
| H | 22.636554 | 13.070865 | -5.824579 |
| C | 24.444442 | 12.192132 | -5.570497 |
| H | 24.160465 | 11.309056 | -5.775122 |
| C | 25.792907 | 12.442014 | -5.229655 |
| C | 26.784855 | 11.419194 | -5.027239 |
| C | 26.605472 | 10.048196 | -5.197023 |
| H | 25.775474 | 9.710677  | -5.513903 |
| C | 27.636783 | 9.185647  | -4.903003 |
| H | 27.517570 | 8.249674  | -5.013473 |
| C | 28.866597 | 9.686202  | -4.439453 |
| H | 29.580192 | 9.098011  | -4.222592 |
| C | 29.011678 | 11.052857 | -4.306889 |
| C | 30.233056 | 11.733422 | -3.865009 |
| C | 31.456122 | 11.086412 | -3.624184 |
| H | 31.525288 | 10.143333 | -3.716979 |
| C | 32.554350 | 11.829743 | -3.252495 |
| H | 33.384348 | 11.403403 | -3.074468 |
| C | 32.435699 | 13.202320 | -3.141175 |
| H | 33.184721 | 13.733666 | -2.898226 |
| C | 31.211509 | 13.787748 | -3.388883 |
| H | 31.136719 | 14.731616 | -3.310279 |

## Dimer II

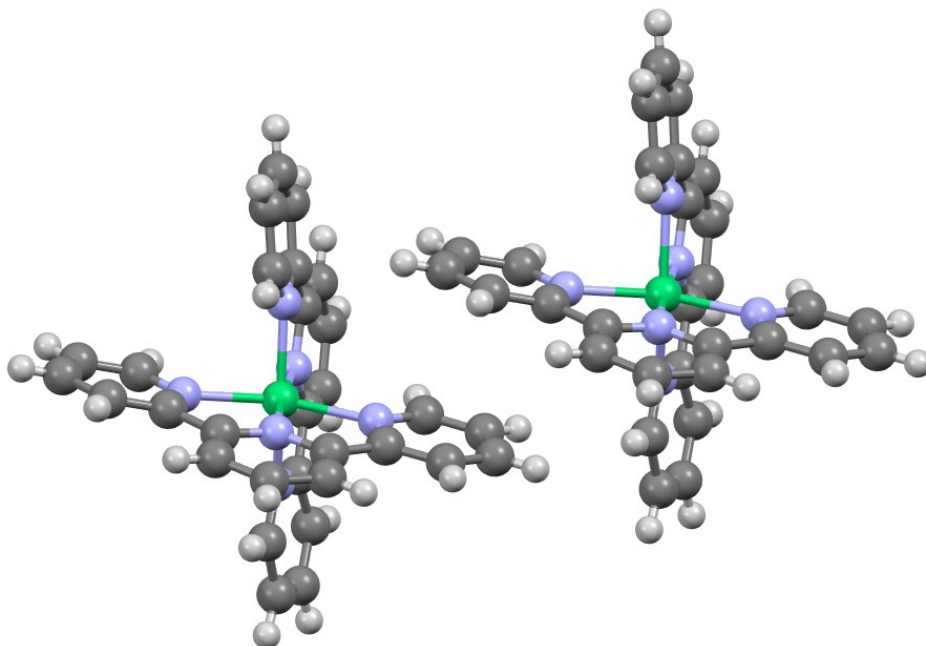

Nonaplet: E(UM062X) = -3306.765759

Singlet (two triplets): E(UM062X) = -3306.700484

Singlet (two quintets): E(UM062X) = -3306.762529

|    |           |           |          |
|----|-----------|-----------|----------|
| Ni | 20.135315 | 9.558300  | 4.392461 |
| N  | 20.214041 | 11.573544 | 5.000047 |
| N  | 22.039923 | 9.752126  | 4.912265 |
| N  | 20.961376 | 7.644113  | 3.878180 |
| N  | 19.470642 | 8.698909  | 6.223546 |
| N  | 18.199216 | 9.296969  | 4.045500 |
| N  | 19.936250 | 10.268076 | 2.398901 |
| C  | 19.238400 | 12.489385 | 4.895355 |
| H  | 18.380848 | 12.197658 | 4.608048 |
| C  | 19.403724 | 13.817355 | 5.177309 |
| H  | 18.685630 | 14.431600 | 5.082984 |
| C  | 20.663904 | 14.242115 | 5.608822 |
| H  | 20.815170 | 15.158351 | 5.810472 |
| C  | 21.681719 | 13.331406 | 5.740111 |
| H  | 22.536459 | 13.611290 | 6.046199 |
| C  | 21.453976 | 11.979357 | 5.419068 |
| C  | 22.456609 | 10.936798 | 5.440397 |
| C  | 23.761212 | 11.061147 | 5.950175 |
| H  | 24.066557 | 11.890141 | 6.300280 |
| C  | 24.590085 | 9.957796  | 5.932839 |
| H  | 25.481376 | 10.033195 | 6.253457 |
| C  | 24.128413 | 8.725358  | 5.445496 |
| H  | 24.685681 | 7.955973  | 5.461557 |
| C  | 22.840117 | 8.657854  | 4.940563 |
| C  | 22.204685 | 7.449102  | 4.397815 |

|    |           |           |           |
|----|-----------|-----------|-----------|
| C  | 22.792881 | 6.181531  | 4.413196  |
| H  | 23.644247 | 6.051655  | 4.814882  |
| C  | 22.127646 | 5.127130  | 3.841980  |
| H  | 22.514529 | 4.259450  | 3.850563  |
| C  | 20.896708 | 5.328457  | 3.255384  |
| H  | 20.443471 | 4.618680  | 2.815713  |
| C  | 20.333254 | 6.605897  | 3.325320  |
| H  | 19.465581 | 6.740115  | 2.963148  |
| C  | 20.212916 | 8.385865  | 7.284823  |
| H  | 21.137947 | 8.599825  | 7.263069  |
| C  | 19.712443 | 7.767673  | 8.416377  |
| H  | 20.277021 | 7.544239  | 9.147094  |
| C  | 18.340923 | 7.483446  | 8.443060  |
| H  | 17.953478 | 7.071318  | 9.206238  |
| C  | 17.566033 | 7.801227  | 7.368951  |
| H  | 16.633129 | 7.620822  | 7.389855  |
| C  | 18.135673 | 8.392576  | 6.232978  |
| C  | 17.427138 | 8.713515  | 5.014323  |
| C  | 16.069114 | 8.477844  | 4.772818  |
| H  | 15.527591 | 8.062953  | 5.434109  |
| C  | 15.521405 | 8.859181  | 3.551189  |
| H  | 14.603122 | 8.694567  | 3.373417  |
| C  | 16.318788 | 9.485664  | 2.580412  |
| H  | 15.947650 | 9.760022  | 1.749931  |
| C  | 17.671751 | 9.696071  | 2.865170  |
| C  | 18.641769 | 10.317816 | 1.958295  |
| C  | 18.324053 | 10.945878 | 0.749412  |
| H  | 17.422077 | 10.995617 | 0.455817  |
| C  | 19.339057 | 11.493803 | -0.012747 |
| H  | 19.137181 | 11.922117 | -0.836344 |
| C  | 20.652095 | 11.416825 | 0.426245  |
| H  | 21.363441 | 11.776450 | -0.090925 |
| C  | 20.894459 | 10.800606 | 1.639801  |
| H  | 21.791373 | 10.754419 | 1.949457  |
| Ni | 20.135315 | 9.558300  | -4.105239 |
| N  | 20.214041 | 11.573544 | -3.497653 |
| N  | 22.039923 | 9.752126  | -3.585435 |
| N  | 20.961376 | 7.644113  | -4.619520 |
| N  | 19.470642 | 8.698909  | -2.274154 |
| N  | 18.199216 | 9.296969  | -4.452200 |
| N  | 19.936250 | 10.268076 | -6.098799 |
| C  | 19.238400 | 12.489385 | -3.602345 |
| H  | 18.380848 | 12.197658 | -3.889652 |
| C  | 19.403724 | 13.817355 | -3.320391 |
| H  | 18.685630 | 14.431600 | -3.414716 |
| C  | 20.663904 | 14.242115 | -2.888878 |
| H  | 20.815170 | 15.158351 | -2.687228 |
| C  | 21.681719 | 13.331406 | -2.757589 |
| H  | 22.536459 | 13.611290 | -2.451501 |
| C  | 21.453976 | 11.979357 | -3.078632 |
| C  | 22.456609 | 10.936798 | -3.057303 |
| C  | 23.761212 | 11.061147 | -2.547525 |

|   |           |           |           |
|---|-----------|-----------|-----------|
| H | 24.066557 | 11.890141 | -2.197420 |
| C | 24.590085 | 9.957796  | -2.564861 |
| H | 25.481376 | 10.033195 | -2.244243 |
| C | 24.128413 | 8.725358  | -3.052204 |
| H | 24.685681 | 7.955973  | -3.036143 |
| C | 22.840117 | 8.657854  | -3.557137 |
| C | 22.204685 | 7.449102  | -4.099885 |
| C | 22.792881 | 6.181531  | -4.084504 |
| H | 23.644247 | 6.051655  | -3.682818 |
| C | 22.127646 | 5.127130  | -4.655720 |
| H | 22.514529 | 4.259450  | -4.647137 |
| C | 20.896708 | 5.328457  | -5.242316 |
| H | 20.443471 | 4.618680  | -5.681987 |
| C | 20.333254 | 6.605897  | -5.172380 |
| H | 19.465581 | 6.740115  | -5.534552 |
| C | 20.212916 | 8.385865  | -1.212877 |
| H | 21.137947 | 8.599825  | -1.234631 |
| C | 19.712443 | 7.767673  | -0.081323 |
| H | 20.277021 | 7.544239  | 0.649394  |
| C | 18.340923 | 7.483446  | -0.054640 |
| H | 17.953478 | 7.071318  | 0.708538  |
| C | 17.566033 | 7.801227  | -1.128749 |
| H | 16.633129 | 7.620822  | -1.107845 |
| C | 18.135673 | 8.392576  | -2.264722 |
| C | 17.427138 | 8.713515  | -3.483377 |
| C | 16.069114 | 8.477844  | -3.724882 |
| H | 15.527591 | 8.062953  | -3.063591 |
| C | 15.521405 | 8.859181  | -4.946511 |
| H | 14.603122 | 8.694567  | -5.124283 |
| C | 16.318788 | 9.485664  | -5.917288 |
| H | 15.947650 | 9.760022  | -6.747769 |
| C | 17.671751 | 9.696071  | -5.632530 |
| C | 18.641769 | 10.317816 | -6.539405 |
| C | 18.324053 | 10.945878 | -7.748288 |
| H | 17.422077 | 10.995617 | -8.041883 |
| C | 19.339057 | 11.493803 | -8.510447 |
| H | 19.137181 | 11.922117 | -9.334044 |
| C | 20.652095 | 11.416825 | -8.071455 |
| H | 21.363441 | 11.776450 | -8.588625 |
| C | 20.894459 | 10.800606 | -6.857899 |
| H | 21.791373 | 10.754419 | -6.548243 |

### Dimer III

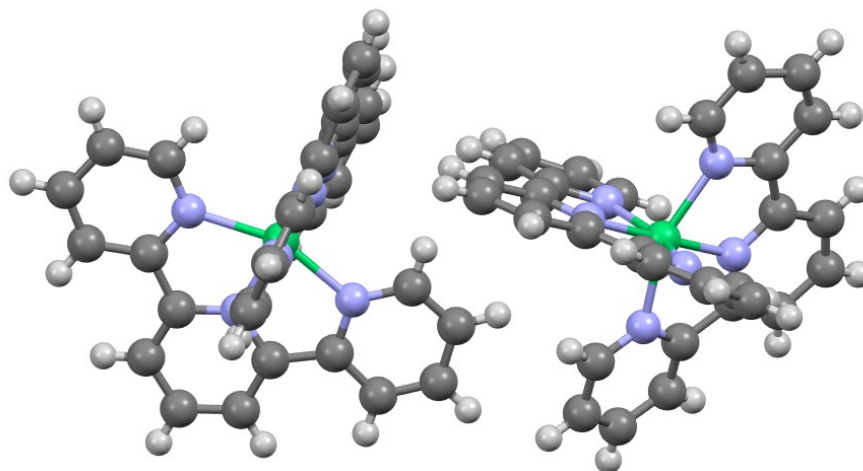

Nonaplet: E(UM062X) = -3306.766108

Singlet (two triplets): E(UM062X) = -3306.720573

Singlet (two quintets): E(UM062X) = -3306.706463

|    |           |           |           |
|----|-----------|-----------|-----------|
| Ni | 28.216545 | 13.858804 | 4.142374  |
| N  | 29.065661 | 14.445811 | 2.306361  |
| N  | 28.551130 | 15.794702 | 4.453815  |
| N  | 27.396669 | 14.185270 | 6.109846  |
| N  | 26.221964 | 13.723007 | 3.488646  |
| N  | 27.994987 | 11.902379 | 3.903928  |
| N  | 30.116654 | 13.083498 | 4.760666  |
| C  | 29.283283 | 13.687874 | 1.224689  |
| H  | 28.995370 | 12.783086 | 1.251626  |
| C  | 29.894534 | 14.131583 | 0.080473  |
| H  | 30.034554 | 13.550497 | -0.657807 |
| C  | 30.309533 | 15.482448 | 0.035435  |
| H  | 30.735216 | 15.829441 | -0.739725 |
| C  | 30.090225 | 16.282230 | 1.120422  |
| H  | 30.353395 | 17.194518 | 1.094164  |
| C  | 29.477849 | 15.765095 | 2.277214  |
| C  | 29.220302 | 16.502900 | 3.483972  |
| C  | 29.589752 | 17.837185 | 3.731170  |
| H  | 30.054236 | 18.335766 | 3.069454  |
| C  | 29.272036 | 18.414718 | 4.941328  |
| H  | 29.520023 | 19.315558 | 5.114681  |
| C  | 28.585432 | 17.680861 | 5.917118  |
| H  | 28.361625 | 18.073251 | 6.752952  |
| C  | 28.238475 | 16.364340 | 5.633550  |
| C  | 27.507448 | 15.467052 | 6.547563  |
| C  | 26.921501 | 15.866154 | 7.738006  |
| H  | 27.009787 | 16.765809 | 8.029987  |
| C  | 26.215216 | 14.968472 | 8.496935  |
| H  | 25.823835 | 15.233355 | 9.321127  |
| C  | 26.082506 | 13.663399 | 8.036955  |

|    |           |           |          |
|----|-----------|-----------|----------|
| H  | 25.583720 | 13.022310 | 8.529481 |
| C  | 26.693758 | 13.321142 | 6.846852 |
| H  | 26.609971 | 12.427013 | 6.537026 |
| C  | 25.318301 | 14.723721 | 3.462473 |
| H  | 25.617460 | 15.606797 | 3.644664 |
| C  | 23.986706 | 14.531079 | 3.185533 |
| H  | 23.378266 | 15.260593 | 3.192076 |
| C  | 23.546965 | 13.231137 | 2.892872 |
| H  | 22.636554 | 13.070865 | 2.673121 |
| C  | 24.444442 | 12.192132 | 2.927203 |
| H  | 24.160465 | 11.309056 | 2.722578 |
| C  | 25.792907 | 12.442014 | 3.268045 |
| C  | 26.784855 | 11.419194 | 3.470461 |
| C  | 26.605472 | 10.048196 | 3.300677 |
| H  | 25.775474 | 9.710677  | 2.983797 |
| C  | 27.636783 | 9.185647  | 3.594697 |
| H  | 27.517570 | 8.249674  | 3.484227 |
| C  | 28.866597 | 9.686202  | 4.058247 |
| H  | 29.580192 | 9.098011  | 4.275108 |
| C  | 29.011678 | 11.052857 | 4.190811 |
| C  | 30.233056 | 11.733422 | 4.632691 |
| C  | 31.456122 | 11.086412 | 4.873516 |
| H  | 31.525288 | 10.143333 | 4.780721 |
| C  | 32.554350 | 11.829743 | 5.245205 |
| H  | 33.384348 | 11.403403 | 5.423232 |
| C  | 32.435699 | 13.202320 | 5.356525 |
| H  | 33.184721 | 13.733666 | 5.599474 |
| C  | 31.211509 | 13.787748 | 5.108817 |
| H  | 31.136719 | 14.731616 | 5.187421 |
| Ni | 22.039360 | 19.427275 | 2.268036 |
| N  | 21.960634 | 21.442519 | 2.875622 |
| N  | 20.134752 | 19.621101 | 2.787840 |
| N  | 21.213299 | 17.513088 | 1.753755 |
| N  | 22.704033 | 18.567884 | 4.099121 |
| N  | 23.975459 | 19.165944 | 1.921075 |
| N  | 22.238425 | 20.137051 | 0.274476 |
| C  | 22.936275 | 22.358360 | 2.770930 |
| H  | 23.793827 | 22.066633 | 2.483623 |
| C  | 22.770951 | 23.686330 | 3.052884 |
| H  | 23.489045 | 24.300575 | 2.958559 |
| C  | 21.510771 | 24.111090 | 3.484397 |
| H  | 21.359505 | 25.027326 | 3.686047 |
| C  | 20.492956 | 23.200381 | 3.615686 |
| H  | 19.638216 | 23.480265 | 3.921774 |
| C  | 20.720699 | 21.848332 | 3.294643 |
| C  | 19.718066 | 20.805773 | 3.315972 |
| C  | 18.413463 | 20.930122 | 3.825750 |
| H  | 18.108118 | 21.759116 | 4.175855 |
| C  | 17.584590 | 19.826771 | 3.808414 |
| H  | 16.693299 | 19.902170 | 4.129032 |
| C  | 18.046262 | 18.594333 | 3.321071 |
| H  | 17.488994 | 17.824948 | 3.337132 |



|   |           |           |           |
|---|-----------|-----------|-----------|
| C | 19.334558 | 18.526829 | 2.816138  |
| C | 19.969990 | 17.318077 | 2.273390  |
| C | 19.381794 | 16.050506 | 2.288771  |
| H | 18.530428 | 15.920630 | 2.690457  |
| C | 20.047029 | 14.996105 | 1.717555  |
| H | 19.660146 | 14.128425 | 1.726138  |
| C | 21.277967 | 15.197432 | 1.130959  |
| H | 21.731204 | 14.487655 | 0.691288  |
| C | 21.841421 | 16.474872 | 1.200895  |
| H | 22.709094 | 16.609090 | 0.838723  |
| C | 21.961759 | 18.254840 | 5.160398  |
| H | 21.036728 | 18.468800 | 5.138644  |
| C | 22.462232 | 17.636648 | 6.291952  |
| H | 21.897654 | 17.413214 | 7.022669  |
| C | 23.833752 | 17.352421 | 6.318635  |
| H | 24.221197 | 16.940293 | 7.081813  |
| C | 24.608642 | 17.670202 | 5.244526  |
| H | 25.541546 | 17.489797 | 5.265430  |
| C | 24.039002 | 18.261551 | 4.108553  |
| C | 24.747537 | 18.582490 | 2.889898  |
| C | 26.105561 | 18.346819 | 2.648393  |
| H | 26.647084 | 17.931928 | 3.309684  |
| C | 26.653270 | 18.728156 | 1.426764  |
| H | 27.571553 | 18.563542 | 1.248992  |
| C | 25.855887 | 19.354639 | 0.455987  |
| H | 26.227025 | 19.628997 | -0.374494 |
| C | 24.502924 | 19.565046 | 0.740745  |
| C | 23.532906 | 20.186791 | -0.166130 |
| C | 23.850622 | 20.814853 | -1.375013 |
| H | 24.752598 | 20.864592 | -1.668608 |
| C | 22.835618 | 21.362778 | -2.137172 |
| H | 23.037494 | 21.791092 | -2.960769 |
| C | 21.522580 | 21.285800 | -1.698180 |
| H | 20.811234 | 21.645425 | -2.215350 |
| C | 21.280216 | 20.669581 | -0.484624 |
| H | 20.383302 | 20.623394 | -0.174968 |

**COORDINATES – M062X / Diisopropylether (PCM)**

**1 – Singlet**

| Center<br>Number | Atomic<br>Number | Atomic<br>Type | Coordinates (Angstroms) |           |          |
|------------------|------------------|----------------|-------------------------|-----------|----------|
|                  |                  |                | X                       | Y         | Z        |
| 1                | 1                | 0              | 4.555835                | 2.066345  | 2.909289 |
| 2                | 6                | 0              | 3.662945                | 1.670355  | 2.434459 |
| 3                | 7                | 0              | 1.361030                | 0.680090  | 1.200370 |
| 4                | 6                | 0              | 3.587835                | 0.344104  | 2.110079 |
| 5                | 6                | 0              | 2.554504                | 2.523955  | 2.170972 |
| 6                | 6                | 0              | 1.447211                | 1.971065  | 1.574352 |
| 7                | 6                | 0              | 2.421477                | -0.176598 | 1.479649 |
| 8                | 1                | 0              | 4.409236                | -0.328938 | 2.336079 |

|    |    |   |           |           |           |
|----|----|---|-----------|-----------|-----------|
| 9  | 1  | 0 | 2.571802  | 3.575649  | 2.430244  |
| 10 | 1  | 0 | 0.571772  | 2.579788  | 1.355393  |
| 11 | 6  | 0 | 2.170521  | -1.517531 | 1.135950  |
| 12 | 6  | 0 | 1.465864  | -3.931059 | -0.056067 |
| 13 | 6  | 0 | 3.089058  | -2.568945 | 1.099142  |
| 14 | 7  | 0 | 0.813534  | -1.770318 | 0.809059  |
| 15 | 6  | 0 | 0.570649  | -2.891093 | 0.008845  |
| 16 | 6  | 0 | 2.732226  | -3.804193 | 0.573366  |
| 17 | 1  | 0 | 4.110190  | -2.395349 | 1.430791  |
| 18 | 1  | 0 | 3.453415  | -4.611523 | 0.518704  |
| 19 | 1  | 0 | 1.232620  | -4.814445 | -0.643650 |
| 20 | 6  | 0 | -0.667226 | -2.805234 | -0.717331 |
| 21 | 6  | 0 | -3.050426 | -2.336447 | -2.043997 |
| 22 | 6  | 0 | -1.351679 | -3.878834 | -1.324401 |
| 23 | 7  | 0 | -1.197038 | -1.540980 | -0.748524 |
| 24 | 6  | 0 | -2.351541 | -1.334917 | -1.403538 |
| 25 | 6  | 0 | -2.531769 | -3.646785 | -1.992768 |
| 26 | 1  | 0 | -0.940041 | -4.879800 | -1.250682 |
| 27 | 1  | 0 | -2.714056 | -0.310577 | -1.412432 |
| 28 | 1  | 0 | -3.060351 | -4.465350 | -2.471076 |
| 29 | 1  | 0 | -3.971017 | -2.110311 | -2.568369 |
| 30 | 28 | 0 | -0.100479 | -0.240062 | 0.276570  |
| 31 | 1  | 0 | -6.077477 | 0.497405  | 1.628131  |
| 32 | 6  | 0 | -4.992402 | 0.485616  | 1.624887  |
| 33 | 7  | 0 | -2.211214 | 0.442714  | 1.593026  |
| 34 | 6  | 0 | -4.285545 | 1.287147  | 0.734995  |
| 35 | 6  | 0 | -4.287923 | -0.339427 | 2.494936  |
| 36 | 6  | 0 | -2.895686 | -0.327445 | 2.436060  |
| 37 | 6  | 0 | -2.890217 | 1.232639  | 0.756324  |
| 38 | 1  | 0 | -4.806889 | 1.915477  | 0.020865  |
| 39 | 1  | 0 | -4.799693 | -0.984368 | 3.200205  |
| 40 | 1  | 0 | -2.299643 | -0.961129 | 3.087066  |
| 41 | 6  | 0 | -2.064257 | 2.036214  | -0.188432 |
| 42 | 6  | 0 | -0.461693 | 3.449390  | -1.898835 |
| 43 | 6  | 0 | -2.505540 | 3.269858  | -0.667762 |
| 44 | 7  | 0 | -0.874292 | 1.521601  | -0.541308 |
| 45 | 6  | 0 | -0.075362 | 2.215537  | -1.373386 |
| 46 | 6  | 0 | -1.693509 | 3.980470  | -1.541508 |
| 47 | 1  | 0 | -3.455729 | 3.673193  | -0.337588 |
| 48 | 1  | 0 | -2.014614 | 4.940509  | -1.931893 |
| 49 | 1  | 0 | 0.197927  | 3.969629  | -2.584303 |
| 50 | 6  | 0 | 1.272320  | 1.646515  | -1.668057 |
| 51 | 6  | 0 | 3.730888  | 0.503584  | -1.927009 |
| 52 | 6  | 0 | 2.395081  | 2.470443  | -1.636505 |
| 53 | 7  | 0 | 1.338201  | 0.323705  | -1.862333 |
| 54 | 6  | 0 | 2.543543  | -0.231636 | -1.974981 |
| 55 | 6  | 0 | 3.651746  | 1.879403  | -1.770631 |
| 56 | 1  | 0 | 2.294326  | 3.536346  | -1.460975 |
| 57 | 1  | 0 | 2.560540  | -1.311078 | -2.105714 |
| 58 | 1  | 0 | 4.549990  | 2.487001  | -1.730610 |
| 59 | 1  | 0 | 4.687164  | -0.001341 | -2.008313 |

```

-----
Zero-point correction=                0.460270
(Hartree/Particle)
Thermal correction to Energy=         0.489007
Thermal correction to Enthalpy=       0.489951
Thermal correction to Gibbs Free Energy= 0.400834
Sum of electronic and zero-point Energies= -1653.218724
Sum of electronic and thermal Energies= -1653.189987
Sum of electronic and thermal Enthalpies= -1653.189043
Sum of electronic and thermal Free Energies= -1653.278160

```

**1 – Triplet**

| Center<br>Number | Atomic<br>Number | Atomic<br>Type | Coordinates (Angstroms) |           |           |
|------------------|------------------|----------------|-------------------------|-----------|-----------|
|                  |                  |                | X                       | Y         | Z         |
| 1                | 1                | 0              | 5.501843                | -1.732421 | 2.043594  |
| 2                | 6                | 0              | 4.497616                | -1.394788 | 1.806171  |
| 3                | 7                | 0              | 1.929304                | -0.530885 | 1.171432  |
| 4                | 6                | 0              | 3.574493                | -2.280842 | 1.287627  |
| 5                | 6                | 0              | 4.126451                | -0.058195 | 2.015343  |
| 6                | 6                | 0              | 2.831626                | 0.310574  | 1.675368  |
| 7                | 6                | 0              | 2.274996                | -1.830697 | 0.973653  |
| 8                | 1                | 0              | 3.859206                | -3.310856 | 1.105403  |
| 9                | 1                | 0              | 4.817979                | 0.669082  | 2.424199  |
| 10               | 1                | 0              | 2.491772                | 1.336979  | 1.802897  |
| 11               | 6                | 0              | 1.246455                | -2.694399 | 0.399755  |
| 12               | 6                | 0              | -0.757695               | -4.176674 | -0.802265 |
| 13               | 6                | 0              | 1.404478                | -4.086792 | 0.243584  |
| 14               | 7                | 0              | 0.098468                | -2.084191 | -0.001747 |
| 15               | 6                | 0              | -0.857955               | -2.803341 | -0.602320 |
| 16               | 6                | 0              | 0.402905                | -4.825182 | -0.352615 |
| 17               | 1                | 0              | 2.302667                | -4.580878 | 0.595563  |
| 18               | 1                | 0              | 0.517575                | -5.896766 | -0.481791 |
| 19               | 1                | 0              | -1.544163               | -4.717468 | -1.315845 |
| 20               | 6                | 0              | -2.056125               | -2.042292 | -1.058526 |
| 21               | 6                | 0              | -4.203813               | -0.519687 | -1.792786 |
| 22               | 6                | 0              | -3.337921               | -2.591649 | -0.962439 |
| 23               | 7                | 0              | -1.834811               | -0.805083 | -1.519382 |
| 24               | 6                | 0              | -2.888101               | -0.068288 | -1.870843 |
| 25               | 6                | 0              | -4.427983               | -1.814474 | -1.336235 |
| 26               | 1                | 0              | -3.474480               | -3.592730 | -0.566903 |
| 27               | 1                | 0              | -2.666132               | 0.936845  | -2.223506 |
| 28               | 1                | 0              | -5.436365               | -2.208370 | -1.255449 |
| 29               | 1                | 0              | -5.024070               | 0.127967  | -2.081971 |
| 30               | 28               | 0              | -0.000127               | -0.000067 | 0.334101  |
| 31               | 1                | 0              | -5.501845               | 1.733328  | 2.043275  |
| 32               | 6                | 0              | -4.497654               | 1.395556  | 1.805892  |
| 33               | 7                | 0              | -1.929445               | 0.531311  | 1.171260  |
| 34               | 6                | 0              | -3.574416               | 2.281473  | 1.287324  |
| 35               | 6                | 0              | -4.126665               | 0.058918  | 2.015134  |
| 36               | 6                | 0              | -2.831875               | -0.310021 | 1.675213  |
| 37               | 6                | 0              | -2.274962               | 1.831153  | 0.973399  |
| 38               | 1                | 0              | -3.858994               | 3.311514  | 1.105044  |
| 39               | 1                | 0              | -4.818296               | -0.668248 | 2.424014  |
| 40               | 1                | 0              | -2.492142               | -1.336461 | 1.802790  |
| 41               | 6                | 0              | -1.246291               | 2.694659  | 0.399470  |
| 42               | 6                | 0              | 0.758095                | 4.176535  | -0.802662 |
| 43               | 6                | 0              | -1.404078               | 4.087080  | 0.243239  |
| 44               | 7                | 0              | -0.098415               | 2.084242  | -0.002027 |
| 45               | 6                | 0              | 0.858107                | 2.803188  | -0.602659 |
| 46               | 6                | 0              | -0.402388               | 4.825263  | -0.353014 |
| 47               | 1                | 0              | -2.302172               | 4.581339  | 0.595223  |
| 48               | 1                | 0              | -0.516868               | 5.896862  | -0.482227 |
| 49               | 1                | 0              | 1.544646                | 4.717172  | -1.316280 |
| 50               | 6                | 0              | 2.056148                | 2.041896  | -1.058821 |
| 51               | 6                | 0              | 4.203573                | 0.518858  | -1.792954 |
| 52               | 6                | 0              | 3.338035                | 2.591051  | -0.962823 |
| 53               | 7                | 0              | 1.834620                | 0.804688  | -1.519573 |
| 54               | 6                | 0              | 2.887781                | 0.067682  | -1.870968 |

|                                              |   |   |          |              |           |
|----------------------------------------------|---|---|----------|--------------|-----------|
| 55                                           | 6 | 0 | 4.427965 | 1.813652     | -1.336541 |
| 56                                           | 1 | 0 | 3.474769 | 3.592150     | -0.567392 |
| 57                                           | 1 | 0 | 2.665640 | -0.937449    | -2.223530 |
| 58                                           | 1 | 0 | 5.436414 | 2.207389     | -1.255804 |
| 59                                           | 1 | 0 | 5.023715 | -0.128971    | -2.082073 |
| -----                                        |   |   |          |              |           |
| Zero-point correction=                       |   |   |          | 0.461028     |           |
| (Hartree/Particle)                           |   |   |          |              |           |
| Thermal correction to Energy=                |   |   |          | 0.490639     |           |
| Thermal correction to Enthalpy=              |   |   |          | 0.491583     |           |
| Thermal correction to Gibbs Free Energy=     |   |   |          | 0.397801     |           |
| Sum of electronic and zero-point Energies=   |   |   |          | -1653.255040 |           |
| Sum of electronic and thermal Energies=      |   |   |          | -1653.225429 |           |
| Sum of electronic and thermal Enthalpies=    |   |   |          | -1653.224485 |           |
| Sum of electronic and thermal Free Energies= |   |   |          | -1653.318266 |           |

### 1 – Quintet

| Center<br>Number | Atomic<br>Number | Atomic<br>Type | Coordinates (Angstroms) |           |           |
|------------------|------------------|----------------|-------------------------|-----------|-----------|
|                  |                  |                | X                       | Y         | Z         |
| 1                | 1                | 0              | 2.858435                | 3.583800  | 3.957327  |
| 2                | 6                | 0              | 2.307434                | 2.949964  | 3.268641  |
| 3                | 7                | 0              | 0.887240                | 1.327665  | 1.509348  |
| 4                | 6                | 0              | 2.976179                | 2.024146  | 2.506675  |
| 5                | 6                | 0              | 0.903754                | 3.073057  | 3.155130  |
| 6                | 6                | 0              | 0.259987                | 2.235803  | 2.262247  |
| 7                | 6                | 0              | 2.255202                | 1.192724  | 1.607118  |
| 8                | 1                | 0              | 4.053115                | 1.922722  | 2.591488  |
| 9                | 1                | 0              | 0.344229                | 3.790704  | 3.742507  |
| 10               | 1                | 0              | -0.820067               | 2.278562  | 2.127864  |
| 11               | 6                | 0              | 2.847605                | 0.195803  | 0.771704  |
| 12               | 6                | 0              | 3.719048                | -1.793193 | -0.996552 |
| 13               | 6                | 0              | 4.231106                | -0.113434 | 0.677943  |
| 14               | 7                | 0              | 1.963548                | -0.511264 | -0.011688 |
| 15               | 6                | 0              | 2.387012                | -1.459990 | -0.864133 |
| 16               | 6                | 0              | 4.656887                | -1.089490 | -0.187568 |
| 17               | 1                | 0              | 4.951408                | 0.423374  | 1.286614  |
| 18               | 1                | 0              | 5.713351                | -1.325966 | -0.262227 |
| 19               | 1                | 0              | 4.054285                | -2.553436 | -1.690816 |
| 20               | 6                | 0              | 1.283841                | -2.093966 | -1.642922 |
| 21               | 6                | 0              | -0.888932               | -3.130456 | -2.978433 |
| 22               | 6                | 0              | 1.471716                | -3.153804 | -2.531932 |
| 23               | 7                | 0              | 0.058876                | -1.577045 | -1.433280 |
| 24               | 6                | 0              | -0.995112               | -2.079031 | -2.075864 |
| 25               | 6                | 0              | 0.373457                | -3.673011 | -3.205861 |
| 26               | 1                | 0              | 2.459157                | -3.571366 | -2.689032 |
| 27               | 1                | 0              | -1.950787               | -1.612531 | -1.846308 |
| 28               | 1                | 0              | 0.501726                | -4.496575 | -3.900922 |
| 29               | 1                | 0              | -1.769718               | -3.511455 | -3.481950 |
| 30               | 28               | 0              | -0.000075               | -0.000198 | 0.088567  |
| 31               | 1                | 0              | -2.862820               | -3.581559 | 3.956311  |
| 32               | 6                | 0              | -2.311128               | -2.948248 | 3.267701  |
| 33               | 7                | 0              | -0.889096               | -1.327264 | 1.508689  |
| 34               | 6                | 0              | -2.978993               | -2.022491 | 2.504905  |
| 35               | 6                | 0              | -0.907412               | -3.071978 | 3.155159  |
| 36               | 6                | 0              | -0.262707               | -2.235345 | 2.262379  |
| 37               | 6                | 0              | -2.257095               | -1.191768 | 1.605423  |
| 38               | 1                | 0              | -4.055939               | -1.920553 | 2.589001  |
| 39               | 1                | 0              | -0.348554               | -3.789599 | 3.743204  |

|    |   |   |           |           |           |
|----|---|---|-----------|-----------|-----------|
| 40 | 1 | 0 | 0.817430  | -2.278543 | 2.128790  |
| 41 | 6 | 0 | -2.848467 | -0.195069 | 0.769010  |
| 42 | 6 | 0 | -3.717655 | 1.794248  | -0.999971 |
| 43 | 6 | 0 | -4.231688 | 0.115146  | 0.674580  |
| 44 | 7 | 0 | -1.963587 | 0.510888  | -0.014454 |
| 45 | 6 | 0 | -2.385919 | 1.459918  | -0.867084 |
| 46 | 6 | 0 | -4.656351 | 1.091347  | -0.191315 |
| 47 | 1 | 0 | -4.952651 | -0.421006 | 1.283039  |
| 48 | 1 | 0 | -5.712604 | 1.328597  | -0.266478 |
| 49 | 1 | 0 | -4.052035 | 2.554953  | -1.694146 |
| 50 | 6 | 0 | -1.281928 | 2.092977  | -1.645469 |
| 51 | 6 | 0 | 0.892165  | 3.128020  | -2.979911 |
| 52 | 6 | 0 | -1.468941 | 3.151731  | -2.535950 |
| 53 | 7 | 0 | -0.057187 | 1.576322  | -1.433984 |
| 54 | 6 | 0 | 0.997449  | 2.077615  | -2.076030 |
| 55 | 6 | 0 | -0.370002 | 3.670227  | -3.209333 |
| 56 | 1 | 0 | -2.456268 | 3.568926  | -2.694709 |
| 57 | 1 | 0 | 1.952896  | 1.611334  | -1.845065 |
| 58 | 1 | 0 | -0.497611 | 4.492873  | -3.905589 |
| 59 | 1 | 0 | 1.773483  | 3.508448  | -3.482931 |

```

-----
Zero-point correction=                0.459189
(Hartree/Particle)
Thermal correction to Energy=         0.488206
Thermal correction to Enthalpy=       0.489150
Thermal correction to Gibbs Free Energy= 0.397052
Sum of electronic and zero-point Energies= -1653.285408
Sum of electronic and thermal Energies= -1653.256391
Sum of electronic and thermal Enthalpies= -1653.255447
Sum of electronic and thermal Free Energies= -1653.347544

```

### COORDINATES – M062X Gas phase

#### 1 – Singlet

| Center<br>Number | Atomic<br>Number | Atomic<br>Type | Coordinates (Angstroms) |           |           |
|------------------|------------------|----------------|-------------------------|-----------|-----------|
|                  |                  |                | X                       | Y         | Z         |
| 1                | 1                | 0              | -4.466969               | -2.448176 | 2.619951  |
| 2                | 6                | 0              | -3.572295               | -1.972600 | 2.229307  |
| 3                | 7                | 0              | -1.271347               | -0.777583 | 1.197469  |
| 4                | 6                | 0              | -3.563819               | -0.627931 | 1.974778  |
| 5                | 6                | 0              | -2.393005               | -2.736609 | 2.010395  |
| 6                | 6                | 0              | -1.289952               | -2.085868 | 1.513547  |
| 7                | 6                | 0              | -2.398043               | -0.003930 | 1.455143  |
| 8                | 1                | 0              | -4.443120               | -0.021902 | 2.170572  |
| 9                | 1                | 0              | -2.353395               | -3.796833 | 2.229082  |
| 10               | 1                | 0              | -0.362432               | -2.624383 | 1.326620  |
| 11               | 6                | 0              | -2.225185               | 1.363283  | 1.158984  |
| 12               | 6                | 0              | -1.646051               | 3.852905  | 0.060118  |
| 13               | 6                | 0              | -3.213707               | 2.349642  | 1.110273  |
| 14               | 7                | 0              | -0.890817               | 1.705587  | 0.859005  |
| 15               | 6                | 0              | -0.687065               | 2.870565  | 0.126820  |
| 16               | 6                | 0              | -2.924968               | 3.617200  | 0.625346  |
| 17               | 1                | 0              | -4.229593               | 2.099488  | 1.405696  |
| 18               | 1                | 0              | -3.696547               | 4.376052  | 0.567032  |
| 19               | 1                | 0              | -1.447404               | 4.772059  | -0.483089 |
| 20               | 6                | 0              | 0.571766                | 2.881482  | -0.571141 |
| 21               | 6                | 0              | 2.981041                | 2.579954  | -1.895139 |

|    |    |   |           |           |           |
|----|----|---|-----------|-----------|-----------|
| 22 | 6  | 0 | 1.211597  | 4.010722  | -1.118033 |
| 23 | 7  | 0 | 1.158636  | 1.645572  | -0.653770 |
| 24 | 6  | 0 | 2.323330  | 1.519669  | -1.307891 |
| 25 | 6  | 0 | 2.406039  | 3.862549  | -1.785478 |
| 26 | 1  | 0 | 0.754584  | 4.987646  | -1.000849 |
| 27 | 1  | 0 | 2.728063  | 0.511926  | -1.356799 |
| 28 | 1  | 0 | 2.902348  | 4.725360  | -2.218626 |
| 29 | 1  | 0 | 3.914224  | 2.419516  | -2.421669 |
| 30 | 28 | 0 | 0.137484  | 0.249563  | 0.317974  |
| 31 | 1  | 0 | 6.143509  | -0.594688 | 1.538838  |
| 32 | 6  | 0 | 5.059524  | -0.543593 | 1.514290  |
| 33 | 7  | 0 | 2.287157  | -0.397642 | 1.429482  |
| 34 | 6  | 0 | 4.340767  | -1.345467 | 0.636293  |
| 35 | 6  | 0 | 4.371754  | 0.337004  | 2.344849  |
| 36 | 6  | 0 | 2.982357  | 0.376535  | 2.258673  |
| 37 | 6  | 0 | 2.946803  | -1.240076 | 0.628639  |
| 38 | 1  | 0 | 4.850211  | -2.012865 | -0.050871 |
| 39 | 1  | 0 | 4.896449  | 0.983806  | 3.038971  |
| 40 | 1  | 0 | 2.393969  | 1.054109  | 2.872127  |
| 41 | 6  | 0 | 2.094180  | -2.032792 | -0.295898 |
| 42 | 6  | 0 | 0.406886  | -3.423200 | -1.939068 |
| 43 | 6  | 0 | 2.480635  | -3.293076 | -0.750531 |
| 44 | 7  | 0 | 0.920393  | -1.476212 | -0.645315 |
| 45 | 6  | 0 | 0.077530  | -2.161857 | -1.441378 |
| 46 | 6  | 0 | 1.625475  | -3.993214 | -1.592453 |
| 47 | 1  | 0 | 3.419756  | -3.724797 | -0.422904 |
| 48 | 1  | 0 | 1.900437  | -4.975864 | -1.962059 |
| 49 | 1  | 0 | -0.287672 | -3.934145 | -2.596745 |
| 50 | 6  | 0 | -1.256666 | -1.551693 | -1.699174 |
| 51 | 6  | 0 | -3.678967 | -0.314112 | -1.754597 |
| 52 | 6  | 0 | -2.404190 | -2.335778 | -1.614552 |
| 53 | 7  | 0 | -1.283206 | -0.221716 | -1.855721 |
| 54 | 6  | 0 | -2.472504 | 0.378134  | -1.876221 |
| 55 | 6  | 0 | -3.644353 | -1.695805 | -1.635888 |
| 56 | 1  | 0 | -2.332056 | -3.406723 | -1.456547 |
| 57 | 1  | 0 | -2.457154 | 1.462266  | -1.969158 |
| 58 | 1  | 0 | -4.559581 | -2.269446 | -1.531711 |
| 59 | 1  | 0 | -4.616374 | 0.231535  | -1.739241 |

```

-----
Zero-point correction=                0.459362 (Hartree/Particle)
Thermal correction to Energy=         0.488096
Thermal correction to Enthalpy=       0.489040
Thermal correction to Gibbs Free Energy= 0.400368
Sum of electronic and zero-point Energies= -1653.206049
Sum of electronic and thermal Energies= -1653.177314
Sum of electronic and thermal Enthalpies= -1653.176370
Sum of electronic and thermal Free Energies= -1653.265043

```

### 1 – Triplet

```

-----

```

| Center<br>Number | Atomic<br>Number | Atomic<br>Type | Coordinates (Angstroms) |           |          |
|------------------|------------------|----------------|-------------------------|-----------|----------|
|                  |                  |                | X                       | Y         | Z        |
| 1                | 1                | 0              | 5.407845                | -1.337023 | 2.363212 |
| 2                | 6                | 0              | 4.412486                | -1.048611 | 2.036329 |
| 3                | 7                | 0              | 1.866019                | -0.307128 | 1.176700 |
| 4                | 6                | 0              | 3.572767                | -1.989063 | 1.495337 |
| 5                | 6                | 0              | 3.974363                | 0.287355  | 2.175099 |

|    |    |   |           |           |           |
|----|----|---|-----------|-----------|-----------|
| 6  | 6  | 0 | 2.698267  | 0.578468  | 1.722762  |
| 7  | 6  | 0 | 2.264874  | -1.621424 | 1.063075  |
| 8  | 1  | 0 | 3.910124  | -3.014908 | 1.398446  |
| 9  | 1  | 0 | 4.603254  | 1.057864  | 2.604797  |
| 10 | 1  | 0 | 2.312928  | 1.597669  | 1.782164  |
| 11 | 6  | 0 | 1.325071  | -2.536718 | 0.496354  |
| 12 | 6  | 0 | -0.589085 | -4.209452 | -0.654679 |
| 13 | 6  | 0 | 1.598572  | -3.923398 | 0.303528  |
| 14 | 7  | 0 | 0.090273  | -2.033530 | 0.127417  |
| 15 | 6  | 0 | -0.800602 | -2.856257 | -0.442860 |
| 16 | 6  | 0 | 0.660625  | -4.746223 | -0.258132 |
| 17 | 1  | 0 | 2.557958  | -4.329987 | 0.603075  |
| 18 | 1  | 0 | 0.875983  | -5.799878 | -0.408677 |
| 19 | 1  | 0 | -1.339025 | -4.816243 | -1.148316 |
| 20 | 6  | 0 | -2.092146 | -2.238849 | -0.861056 |
| 21 | 6  | 0 | -4.438159 | -1.027290 | -1.591981 |
| 22 | 6  | 0 | -3.305459 | -2.896706 | -0.617916 |
| 23 | 7  | 0 | -2.037803 | -1.037895 | -1.449429 |
| 24 | 6  | 0 | -3.184467 | -0.459330 | -1.803410 |
| 25 | 6  | 0 | -4.493399 | -2.279216 | -0.985832 |
| 26 | 1  | 0 | -3.300267 | -3.862617 | -0.123463 |
| 27 | 1  | 0 | -3.093327 | 0.516501  | -2.277302 |
| 28 | 1  | 0 | -5.447474 | -2.762725 | -0.796866 |
| 29 | 1  | 0 | -5.338061 | -0.503358 | -1.895970 |
| 30 | 28 | 0 | -0.040037 | 0.045074  | 0.296922  |
| 31 | 1  | 0 | -5.294315 | 2.285911  | 2.232699  |
| 32 | 6  | 0 | -4.364871 | 1.852557  | 1.877109  |
| 33 | 7  | 0 | -1.987191 | 0.758371  | 0.962927  |
| 34 | 6  | 0 | -3.400367 | 2.658218  | 1.284393  |
| 35 | 6  | 0 | -4.121100 | 0.489582  | 2.008409  |
| 36 | 6  | 0 | -2.911254 | -0.009749 | 1.538235  |
| 37 | 6  | 0 | -2.215076 | 2.073362  | 0.833022  |
| 38 | 1  | 0 | -3.574673 | 3.722448  | 1.177588  |
| 39 | 1  | 0 | -4.847134 | -0.176318 | 2.460933  |
| 40 | 1  | 0 | -2.665153 | -1.066688 | 1.605907  |
| 41 | 6  | 0 | -1.128553 | 2.845156  | 0.162884  |
| 42 | 6  | 0 | 0.954973  | 4.080711  | -1.125027 |
| 43 | 6  | 0 | -1.207951 | 4.215170  | -0.095015 |
| 44 | 7  | 0 | -0.055097 | 2.127096  | -0.192939 |
| 45 | 6  | 0 | 0.957148  | 2.713845  | -0.844174 |
| 46 | 6  | 0 | -0.144344 | 4.836947  | -0.738416 |
| 47 | 1  | 0 | -2.078934 | 4.790859  | 0.193695  |
| 48 | 1  | 0 | -0.182660 | 5.900355  | -0.952125 |
| 49 | 1  | 0 | 1.787120  | 4.526562  | -1.659188 |
| 50 | 6  | 0 | 2.075255  | 1.814991  | -1.241571 |
| 51 | 6  | 0 | 4.024579  | -0.013977 | -1.744527 |
| 52 | 6  | 0 | 3.404557  | 2.200710  | -1.080726 |
| 53 | 7  | 0 | 1.709223  | 0.604994  | -1.677809 |
| 54 | 6  | 0 | 2.666494  | -0.284366 | -1.923041 |
| 55 | 6  | 0 | 4.397395  | 1.257308  | -1.329715 |
| 56 | 1  | 0 | 3.651133  | 3.190952  | -0.709874 |
| 57 | 1  | 0 | 2.328810  | -1.263955 | -2.252494 |
| 58 | 1  | 0 | 5.442300  | 1.504969  | -1.171495 |
| 59 | 1  | 0 | 4.763072  | -0.788307 | -1.919389 |

-----

|                                            |                             |
|--------------------------------------------|-----------------------------|
| Zero-point correction=                     | 0.459764 (Hartree/Particle) |
| Thermal correction to Energy=              | 0.489414                    |
| Thermal correction to Enthalpy=            | 0.490358                    |
| Thermal correction to Gibbs Free Energy=   | 0.395699                    |
| Sum of electronic and zero-point Energies= | -1653.251715                |

Sum of electronic and thermal Energies= -1653.222065  
 Sum of electronic and thermal Enthalpies= -1653.221121  
 Sum of electronic and thermal Free Energies= -1653.315780

### 1 – Quintet

| Center<br>Number | Atomic<br>Number | Atomic<br>Type | Coordinates (Angstroms) |           |           |
|------------------|------------------|----------------|-------------------------|-----------|-----------|
|                  |                  |                | X                       | Y         | Z         |
| 1                | 1                | 0              | -2.952379               | -3.498090 | 3.956927  |
| 2                | 6                | 0              | -2.385541               | -2.877993 | 3.268593  |
| 3                | 7                | 0              | -0.928424               | -1.293648 | 1.511384  |
| 4                | 6                | 0              | -3.033142               | -1.944788 | 2.496892  |
| 5                | 6                | 0              | -0.985550               | -3.025608 | 3.166742  |
| 6                | 6                | 0              | -0.320323               | -2.205685 | 2.273585  |
| 7                | 6                | 0              | -2.291245               | -1.132609 | 1.599499  |
| 8                | 1                | 0              | -4.108372               | -1.822302 | 2.573899  |
| 9                | 1                | 0              | -0.443053               | -3.748689 | 3.763203  |
| 10               | 1                | 0              | 0.759686                | -2.265290 | 2.146883  |
| 11               | 6                | 0              | -2.855903               | -0.125066 | 0.754616  |
| 12               | 6                | 0              | -3.666479               | 1.878475  | -1.023065 |
| 13               | 6                | 0              | -4.228642               | 0.210252  | 0.644437  |
| 14               | 7                | 0              | -1.946509               | 0.562917  | -0.019343 |
| 15               | 6                | 0              | -2.343690               | 1.520861  | -0.876130 |
| 16               | 6                | 0              | -4.628498               | 1.193821  | -0.226124 |
| 17               | 1                | 0              | -4.965296               | -0.313354 | 1.245234  |
| 18               | 1                | 0              | -5.679216               | 1.449808  | -0.313121 |
| 19               | 1                | 0              | -3.978441               | 2.644885  | -1.721732 |
| 20               | 6                | 0              | -1.220994               | 2.133108  | -1.640885 |
| 21               | 6                | 0              | 0.989946                | 3.128721  | -2.946186 |
| 22               | 6                | 0              | -1.373177               | 3.206525  | -2.521552 |
| 23               | 7                | 0              | -0.010645               | 1.584795  | -1.426344 |
| 24               | 6                | 0              | 1.061536                | 2.066903  | -2.053180 |
| 25               | 6                | 0              | -0.256998               | 3.704545  | -3.179704 |
| 26               | 1                | 0              | -2.349039               | 3.649983  | -2.680688 |
| 27               | 1                | 0              | 2.002532                | 1.574735  | -1.815931 |
| 28               | 1                | 0              | -0.357915               | 4.538936  | -3.866801 |
| 29               | 1                | 0              | 1.884836                | 3.493881  | -3.436672 |
| 30               | 28               | 0              | 0.000042                | 0.000044  | 0.093867  |
| 31               | 1                | 0              | 2.954094                | 3.496585  | 3.957046  |
| 32               | 6                | 0              | 2.386977                | 2.876770  | 3.268687  |
| 33               | 7                | 0              | 0.929151                | 1.293162  | 1.511410  |
| 34               | 6                | 0              | 3.034242                | 1.943746  | 2.496486  |
| 35               | 6                | 0              | 0.986970                | 3.024572  | 3.167316  |
| 36               | 6                | 0              | 0.321380                | 2.205012  | 2.274096  |
| 37               | 6                | 0              | 2.291981                | 1.131946  | 1.599046  |
| 38               | 1                | 0              | 4.109484                | 1.821122  | 2.573111  |
| 39               | 1                | 0              | 0.444736                | 3.747521  | 3.764177  |
| 40               | 1                | 0              | -0.758662               | 2.264770  | 2.147747  |
| 41               | 6                | 0              | 2.856245                | 0.124640  | 0.753615  |
| 42               | 6                | 0              | 3.665957                | -1.878538 | -1.024866 |
| 43               | 6                | 0              | 4.228887                | -0.210920 | 0.642984  |
| 44               | 7                | 0              | 1.946525                | -0.562865 | -0.020386 |
| 45               | 6                | 0              | 2.343282                | -1.520661 | -0.877527 |
| 46               | 6                | 0              | 4.628318                | -1.194310 | -0.227972 |
| 47               | 1                | 0              | 4.965801                | 0.312332  | 1.243772  |
| 48               | 1                | 0              | 5.678960                | -1.450499 | -0.315302 |
| 49               | 1                | 0              | 3.977582                | -2.644862 | -1.723778 |
| 50               | 6                | 0              | 1.220249                | -2.132459 | -1.642152 |
| 51               | 6                | 0              | -0.991243               | -3.127258 | -2.947139 |



|    |   |   |           |           |           |
|----|---|---|-----------|-----------|-----------|
| 52 | 6 | 0 | 1.372000  | -3.205557 | -2.523283 |
| 53 | 7 | 0 | 0.010050  | -1.584042 | -1.427032 |
| 54 | 6 | 0 | -1.062396 | -2.065757 | -2.053720 |
| 55 | 6 | 0 | 0.255543  | -3.703172 | -3.181269 |
| 56 | 1 | 0 | 2.347751  | -3.649082 | -2.682914 |
| 57 | 1 | 0 | -2.003244 | -1.573531 | -1.816007 |
| 58 | 1 | 0 | 0.356129  | -4.537315 | -3.868716 |
| 59 | 1 | 0 | -1.886341 | -3.492101 | -3.437481 |

-----

Zero-point correction= 0.458808 (Hartree/Particle)  
 Thermal correction to Energy= 0.487879  
 Thermal correction to Enthalpy= 0.488823  
 Thermal correction to Gibbs Free Energy= 0.396375  
 Sum of electronic and zero-point Energies= -1653.277116  
 Sum of electronic and thermal Energies= -1653.248044  
 Sum of electronic and thermal Enthalpies= -1653.247100  
 Sum of electronic and thermal Free Energies= -1653.339548

### Dimer nonaplet

-----

| Center<br>Number | Atomic<br>Number | Atomic<br>Type | Coordinates (Angstroms) |           |           |
|------------------|------------------|----------------|-------------------------|-----------|-----------|
|                  |                  |                | X                       | Y         | Z         |
| 1                | 28               | 0              | 4.647516                | -0.014478 | 0.081398  |
| 2                | 7                | 0              | 5.953183                | -0.319516 | 1.731961  |
| 3                | 7                | 0              | 5.729626                | -1.622282 | -0.520717 |
| 4                | 7                | 0              | 3.819710                | -0.508170 | -1.894840 |
| 5                | 7                | 0              | 2.832632                | -0.742279 | 0.930920  |
| 6                | 7                | 0              | 3.632042                | 1.704490  | 0.458911  |
| 7                | 7                | 0              | 5.975535                | 1.565937  | -0.668966 |
| 8                | 6                | 0              | 5.973973                | 0.377810  | 2.870356  |
| 9                | 1                | 0              | 5.196674                | 1.135114  | 2.960384  |
| 10               | 6                | 0              | 6.900485                | 0.175998  | 3.876902  |
| 11               | 1                | 0              | 6.872147                | 0.769093  | 4.782608  |
| 12               | 6                | 0              | 7.874433                | -0.826157 | 3.674839  |
| 13               | 1                | 0              | 8.624380                | -1.020008 | 4.436151  |
| 14               | 6                | 0              | 7.871505                | -1.559278 | 2.513874  |
| 15               | 1                | 0              | 8.613367                | -2.334764 | 2.354822  |
| 16               | 6                | 0              | 6.888852                | -1.306286 | 1.520461  |
| 17               | 6                | 0              | 6.777992                | -2.014234 | 0.282609  |
| 18               | 6                | 0              | 7.631032                | -3.049828 | -0.179122 |
| 19               | 1                | 0              | 8.463799                | -3.380083 | 0.433477  |
| 20               | 6                | 0              | 7.407717                | -3.629855 | -1.402656 |
| 21               | 1                | 0              | 8.062961                | -4.418340 | -1.757928 |
| 22               | 6                | 0              | 6.320297                | -3.196572 | -2.215260 |
| 23               | 1                | 0              | 6.151709                | -3.633242 | -3.192054 |
| 24               | 6                | 0              | 5.518341                | -2.190432 | -1.720311 |
| 25               | 6                | 0              | 4.344804                | -1.620127 | -2.440644 |
| 26               | 6                | 0              | 3.778170                | -2.195242 | -3.579754 |
| 27               | 1                | 0              | 4.197772                | -3.102395 | -3.999075 |
| 28               | 6                | 0              | 2.652148                | -1.610028 | -4.143934 |
| 29               | 1                | 0              | 2.190683                | -2.052226 | -5.021276 |
| 30               | 6                | 0              | 2.112168                | -0.463759 | -3.564486 |
| 31               | 1                | 0              | 1.221960                | 0.013046  | -3.959630 |
| 32               | 6                | 0              | 2.738838                | 0.051696  | -2.436145 |
| 33               | 1                | 0              | 2.366044                | 0.937446  | -1.924149 |
| 34               | 6                | 0              | 2.481545                | -2.022088 | 1.092474  |
| 35               | 1                | 0              | 3.249761                | -2.746614 | 0.825624  |
| 36               | 6                | 0              | 1.242893                | -2.426018 | 1.554434  |
| 37               | 1                | 0              | 1.000980                | -3.477552 | 1.649570  |

|    |    |   |           |           |           |
|----|----|---|-----------|-----------|-----------|
| 38 | 6  | 0 | 0.305196  | -1.420629 | 1.881151  |
| 39 | 1  | 0 | -0.688921 | -1.693775 | 2.225852  |
| 40 | 6  | 0 | 0.648620  | -0.099319 | 1.735556  |
| 41 | 1  | 0 | -0.061498 | 0.687875  | 1.967906  |
| 42 | 6  | 0 | 1.931526  | 0.250866  | 1.235404  |
| 43 | 6  | 0 | 2.363237  | 1.589982  | 0.982229  |
| 44 | 6  | 0 | 1.607903  | 2.774469  | 1.189817  |
| 45 | 1  | 0 | 0.604006  | 2.714676  | 1.597950  |
| 46 | 6  | 0 | 2.137975  | 3.993279  | 0.848160  |
| 47 | 1  | 0 | 1.560174  | 4.899208  | 1.000895  |
| 48 | 6  | 0 | 3.443036  | 4.076537  | 0.283026  |
| 49 | 1  | 0 | 3.855396  | 5.033851  | -0.010268 |
| 50 | 6  | 0 | 4.140823  | 2.898674  | 0.113681  |
| 51 | 6  | 0 | 5.508972  | 2.812433  | -0.472620 |
| 52 | 6  | 0 | 6.285044  | 3.926718  | -0.798412 |
| 53 | 1  | 0 | 5.905679  | 4.927122  | -0.626626 |
| 54 | 6  | 0 | 7.552595  | 3.734827  | -1.332218 |
| 55 | 1  | 0 | 8.169369  | 4.590292  | -1.589336 |
| 56 | 6  | 0 | 8.024278  | 2.439239  | -1.527352 |
| 57 | 1  | 0 | 9.009771  | 2.250115  | -1.936990 |
| 58 | 6  | 0 | 7.194020  | 1.381764  | -1.175457 |
| 59 | 1  | 0 | 7.501609  | 0.344553  | -1.292824 |
| 60 | 28 | 0 | -4.692402 | -0.073816 | -0.122998 |
| 61 | 7  | 0 | -3.459564 | -1.781162 | -0.446681 |
| 62 | 7  | 0 | -2.958614 | 0.768387  | -0.769712 |
| 63 | 7  | 0 | -5.103032 | 2.087043  | -0.101419 |
| 64 | 7  | 0 | -6.044860 | -0.326436 | -1.746357 |
| 65 | 7  | 0 | -6.358449 | -0.770321 | 0.810598  |
| 66 | 7  | 0 | -4.136587 | -0.133205 | 2.001042  |
| 67 | 6  | 0 | -3.804812 | -3.060746 | -0.280732 |
| 68 | 1  | 0 | -4.852198 | -3.227255 | -0.033356 |
| 69 | 6  | 0 | -2.919294 | -4.115822 | -0.404976 |
| 70 | 1  | 0 | -3.252868 | -5.136247 | -0.261243 |
| 71 | 6  | 0 | -1.578198 | -3.808952 | -0.722714 |
| 72 | 1  | 0 | -0.843555 | -4.602448 | -0.825927 |
| 73 | 6  | 0 | -1.199382 | -2.501101 | -0.902780 |
| 74 | 1  | 0 | -0.167979 | -2.257360 | -1.136577 |
| 75 | 6  | 0 | -2.159315 | -1.464464 | -0.762004 |
| 76 | 6  | 0 | -1.876275 | -0.071294 | -0.920801 |
| 77 | 6  | 0 | -0.601870 | 0.499136  | -1.168463 |
| 78 | 1  | 0 | 0.266943  | -0.143841 | -1.271101 |
| 79 | 6  | 0 | -0.460456 | 1.864047  | -1.230713 |
| 80 | 1  | 0 | 0.515576  | 2.310542  | -1.395168 |
| 81 | 6  | 0 | -1.588896 | 2.708871  | -1.018941 |
| 82 | 1  | 0 | -1.472551 | 3.785930  | -1.009665 |
| 83 | 6  | 0 | -2.806713 | 2.104768  | -0.788886 |
| 84 | 6  | 0 | -4.066876 | 2.845732  | -0.503997 |
| 85 | 6  | 0 | -4.202660 | 4.229004  | -0.641504 |
| 86 | 1  | 0 | -3.367358 | 4.828013  | -0.985097 |
| 87 | 6  | 0 | -5.423894 | 4.820296  | -0.348394 |
| 88 | 1  | 0 | -5.547391 | 5.894072  | -0.450805 |
| 89 | 6  | 0 | -6.488580 | 4.023302  | 0.066483  |
| 90 | 1  | 0 | -7.459076 | 4.447822  | 0.296209  |
| 91 | 6  | 0 | -6.277884 | 2.653900  | 0.170155  |
| 92 | 1  | 0 | -7.067850 | 1.970852  | 0.475934  |
| 93 | 6  | 0 | -5.799457 | -0.079490 | -3.035764 |
| 94 | 1  | 0 | -4.785944 | 0.253071  | -3.254739 |
| 95 | 6  | 0 | -6.739295 | -0.226408 | -4.039321 |
| 96 | 1  | 0 | -6.485888 | -0.012665 | -5.070413 |
| 97 | 6  | 0 | -8.028770 | -0.664798 | -3.665711 |
| 98 | 1  | 0 | -8.800609 | -0.796816 | -4.418221 |

|     |   |   |           |           |           |
|-----|---|---|-----------|-----------|-----------|
| 99  | 6 | 0 | -8.306020 | -0.926524 | -2.347105 |
| 100 | 1 | 0 | -9.293670 | -1.264690 | -2.051989 |
| 101 | 6 | 0 | -7.295824 | -0.755402 | -1.363425 |
| 102 | 6 | 0 | -7.473078 | -0.998017 | 0.034578  |
| 103 | 6 | 0 | -8.662368 | -1.437241 | 0.672930  |
| 104 | 1 | 0 | -9.554633 | -1.631964 | 0.086723  |
| 105 | 6 | 0 | -8.684184 | -1.617282 | 2.033106  |
| 106 | 1 | 0 | -9.593148 | -1.951501 | 2.522595  |
| 107 | 6 | 0 | -7.517016 | -1.365077 | 2.809840  |
| 108 | 1 | 0 | -7.533386 | -1.492801 | 3.885060  |
| 109 | 6 | 0 | -6.385466 | -0.946237 | 2.142619  |
| 110 | 6 | 0 | -5.084150 | -0.646000 | 2.805566  |
| 111 | 6 | 0 | -4.819981 | -0.887079 | 4.155997  |
| 112 | 1 | 0 | -5.584019 | -1.311188 | 4.796959  |
| 113 | 6 | 0 | -3.558874 | -0.596874 | 4.660655  |
| 114 | 1 | 0 | -3.334940 | -0.787418 | 5.705622  |
| 115 | 6 | 0 | -2.584098 | -0.073906 | 3.813526  |
| 116 | 1 | 0 | -1.581611 | 0.148376  | 4.163700  |
| 117 | 6 | 0 | -2.926541 | 0.141655  | 2.483868  |
| 118 | 1 | 0 | -2.215369 | 0.534336  | 1.759830  |

-----  
**SCF=QC**

|                                              |              |
|----------------------------------------------|--------------|
| Zero-point correction=                       | 0.919502     |
| (Hartree/Particle)                           |              |
| Thermal correction to Energy=                | 0.979680     |
| Thermal correction to Enthalpy=              | 0.980624     |
| Thermal correction to Gibbs Free Energy=     | 0.816258     |
| Sum of electronic and zero-point Energies=   | -3306.568083 |
| Sum of electronic and thermal Energies=      | -3306.507905 |
| Sum of electronic and thermal Enthalpies=    | -3306.506960 |
| Sum of electronic and thermal Free Energies= | -3306.671326 |

**SCF=XQC**

|                                              |              |
|----------------------------------------------|--------------|
| Zero-point correction=                       | 0.919497     |
| (Hartree/Particle)                           |              |
| Thermal correction to Energy=                | 0.979676     |
| Thermal correction to Enthalpy=              | 0.980620     |
| Thermal correction to Gibbs Free Energy=     | 0.816246     |
| Sum of electronic and zero-point Energies=   | -3306.568088 |
| Sum of electronic and thermal Energies=      | -3306.507909 |
| Sum of electronic and thermal Enthalpies=    | -3306.506964 |
| Sum of electronic and thermal Free Energies= | -3306.671339 |

**Dimer singlet with two triplet subunits**

Standard orientation:

| Center<br>Number | Atomic<br>Number | Atomic<br>Type | Coordinates (Angstroms) |           |           |
|------------------|------------------|----------------|-------------------------|-----------|-----------|
|                  |                  |                | X                       | Y         | Z         |
| 1                | 28               | 0              | 4.106412                | 0.004233  | 0.064282  |
| 2                | 7                | 0              | 5.995642                | -0.808270 | 0.624906  |
| 3                | 7                | 0              | 3.938988                | -1.926369 | -0.548368 |
| 4                | 7                | 0              | 2.139045                | -0.063012 | -0.921810 |
| 5                | 7                | 0              | 3.288600                | -0.109775 | 2.011934  |
| 6                | 7                | 0              | 3.919842                | 1.975180  | 0.561113  |
| 7                | 7                | 0              | 4.979877                | 1.086691  | -1.652271 |
| 8                | 6                | 0              | 7.016526                | -0.160336 | 1.190481  |
| 9                | 1                | 0              | 6.869022                | 0.911479  | 1.315209  |
| 10               | 6                | 0              | 8.185572                | -0.773545 | 1.603154  |
| 11               | 1                | 0              | 8.982609                | -0.197877 | 2.057215  |

|    |    |   |           |           |           |
|----|----|---|-----------|-----------|-----------|
| 12 | 6  | 0 | 8.288728  | -2.170000 | 1.416021  |
| 13 | 1  | 0 | 9.186696  | -2.698107 | 1.723394  |
| 14 | 6  | 0 | 7.250764  | -2.861936 | 0.843961  |
| 15 | 1  | 0 | 7.324679  | -3.933914 | 0.694152  |
| 16 | 6  | 0 | 6.077374  | -2.171266 | 0.437003  |
| 17 | 6  | 0 | 4.941465  | -2.789959 | -0.170608 |
| 18 | 6  | 0 | 4.750955  | -4.182049 | -0.390901 |
| 19 | 1  | 0 | 5.526525  | -4.888506 | -0.113773 |
| 20 | 6  | 0 | 3.575123  | -4.631272 | -0.934712 |
| 21 | 1  | 0 | 3.423581  | -5.694256 | -1.093920 |
| 22 | 6  | 0 | 2.542215  | -3.714310 | -1.282482 |
| 23 | 1  | 0 | 1.603000  | -4.067706 | -1.689154 |
| 24 | 6  | 0 | 2.786879  | -2.370969 | -1.070436 |
| 25 | 6  | 0 | 1.808570  | -1.286528 | -1.375531 |
| 26 | 6  | 0 | 0.619389  | -1.499820 | -2.072372 |
| 27 | 1  | 0 | 0.372549  | -2.488019 | -2.442816 |
| 28 | 6  | 0 | -0.244901 | -0.432478 | -2.290313 |
| 29 | 1  | 0 | -1.179781 | -0.580009 | -2.824870 |
| 30 | 6  | 0 | 0.105055  | 0.825808  | -1.808217 |
| 31 | 1  | 0 | -0.545370 | 1.682537  | -1.942302 |
| 32 | 6  | 0 | 1.309453  | 0.960719  | -1.126959 |
| 33 | 1  | 0 | 1.625465  | 1.920082  | -0.721684 |
| 34 | 6  | 0 | 3.100382  | -1.215680 | 2.734577  |
| 35 | 1  | 0 | 3.495273  | -2.129805 | 2.290328  |
| 36 | 6  | 0 | 2.442796  | -1.232080 | 3.952297  |
| 37 | 1  | 0 | 2.310700  | -2.158247 | 4.497923  |
| 38 | 6  | 0 | 1.954275  | -0.000346 | 4.445896  |
| 39 | 1  | 0 | 1.418777  | 0.035655  | 5.389842  |
| 40 | 6  | 0 | 2.162670  | 1.155528  | 3.733933  |
| 41 | 1  | 0 | 1.797555  | 2.104394  | 4.113290  |
| 42 | 6  | 0 | 2.862272  | 1.107255  | 2.495965  |
| 43 | 6  | 0 | 3.169291  | 2.241644  | 1.682710  |
| 44 | 6  | 0 | 2.747507  | 3.580045  | 1.913719  |
| 45 | 1  | 0 | 2.170656  | 3.822669  | 2.800962  |
| 46 | 6  | 0 | 3.054204  | 4.559515  | 1.003468  |
| 47 | 1  | 0 | 2.722677  | 5.579290  | 1.171188  |
| 48 | 6  | 0 | 3.790394  | 4.242805  | -0.173365 |
| 49 | 1  | 0 | 3.991287  | 5.000546  | -0.920327 |
| 50 | 6  | 0 | 4.192469  | 2.932073  | -0.337489 |
| 51 | 6  | 0 | 4.921191  | 2.425523  | -1.536378 |
| 52 | 6  | 0 | 5.519605  | 3.256765  | -2.484238 |
| 53 | 1  | 0 | 5.486923  | 4.333521  | -2.364740 |
| 54 | 6  | 0 | 6.173929  | 2.682510  | -3.566768 |
| 55 | 1  | 0 | 6.646932  | 3.312695  | -4.313533 |
| 56 | 6  | 0 | 6.225169  | 1.295682  | -3.677418 |
| 57 | 1  | 0 | 6.730736  | 0.810771  | -4.504388 |
| 58 | 6  | 0 | 5.614257  | 0.536655  | -2.685774 |
| 59 | 1  | 0 | 5.627217  | -0.550667 | -2.702036 |
| 60 | 28 | 0 | -4.051957 | 0.076975  | -0.030701 |
| 61 | 7  | 0 | -2.215600 | -1.071115 | 0.398425  |
| 62 | 7  | 0 | -2.818952 | 1.452417  | 0.756919  |
| 63 | 7  | 0 | -5.303353 | 1.817007  | 0.024307  |
| 64 | 7  | 0 | -3.664415 | 0.281935  | -2.125279 |
| 65 | 7  | 0 | -5.020698 | -1.524159 | -0.805058 |
| 66 | 7  | 0 | -5.058175 | -0.828431 | 1.712207  |
| 67 | 6  | 0 | -2.021613 | -2.378953 | 0.224629  |
| 68 | 1  | 0 | -2.835244 | -2.917308 | -0.257725 |
| 69 | 6  | 0 | -0.858854 | -3.022762 | 0.630974  |
| 70 | 1  | 0 | -0.734610 | -4.087564 | 0.467114  |
| 71 | 6  | 0 | 0.128810  | -2.264255 | 1.254796  |
| 72 | 1  | 0 | 1.051911  | -2.724199 | 1.595160  |

|     |   |   |           |           |           |
|-----|---|---|-----------|-----------|-----------|
| 73  | 6 | 0 | -0.068062 | -0.900667 | 1.432894  |
| 74  | 1 | 0 | 0.687831  | -0.296285 | 1.922140  |
| 75  | 6 | 0 | -1.256630 | -0.325517 | 0.978489  |
| 76  | 6 | 0 | -1.559069 | 1.128568  | 1.096947  |
| 77  | 6 | 0 | -0.631089 | 2.073796  | 1.485300  |
| 78  | 1 | 0 | 0.391345  | 1.805061  | 1.723949  |
| 79  | 6 | 0 | -1.051819 | 3.433484  | 1.513699  |
| 80  | 1 | 0 | -0.339784 | 4.206045  | 1.787887  |
| 81  | 6 | 0 | -2.340570 | 3.768971  | 1.183233  |
| 82  | 1 | 0 | -2.654825 | 4.807496  | 1.203512  |
| 83  | 6 | 0 | -3.259645 | 2.757518  | 0.796587  |
| 84  | 6 | 0 | -4.622943 | 2.949231  | 0.413197  |
| 85  | 6 | 0 | -5.294517 | 4.201186  | 0.415500  |
| 86  | 1 | 0 | -4.765856 | 5.096604  | 0.725029  |
| 87  | 6 | 0 | -6.610436 | 4.272188  | 0.031446  |
| 88  | 1 | 0 | -7.124910 | 5.228778  | 0.034664  |
| 89  | 6 | 0 | -7.291210 | 3.100491  | -0.367038 |
| 90  | 1 | 0 | -8.327514 | 3.120691  | -0.681119 |
| 91  | 6 | 0 | -6.580362 | 1.913759  | -0.350116 |
| 92  | 1 | 0 | -7.042795 | 0.975876  | -0.655097 |
| 93  | 6 | 0 | -3.104476 | 1.320046  | -2.745458 |
| 94  | 1 | 0 | -2.896247 | 2.179668  | -2.107971 |
| 95  | 6 | 0 | -2.785959 | 1.328532  | -4.093220 |
| 96  | 1 | 0 | -2.327251 | 2.196554  | -4.550479 |
| 97  | 6 | 0 | -3.080261 | 0.162791  | -4.836418 |
| 98  | 1 | 0 | -2.832843 | 0.112811  | -5.892789 |
| 99  | 6 | 0 | -3.694526 | -0.904561 | -4.226673 |
| 100 | 1 | 0 | -3.943778 | -1.791799 | -4.799214 |
| 101 | 6 | 0 | -4.024668 | -0.833721 | -2.844901 |
| 102 | 6 | 0 | -4.744298 | -1.832214 | -2.119869 |
| 103 | 6 | 0 | -5.182115 | -3.085655 | -2.626531 |
| 104 | 1 | 0 | -4.995427 | -3.345460 | -3.663430 |
| 105 | 6 | 0 | -5.828030 | -3.971401 | -1.802706 |
| 106 | 1 | 0 | -6.157501 | -4.931019 | -2.187578 |
| 107 | 6 | 0 | -6.056973 | -3.644026 | -0.435963 |
| 108 | 1 | 0 | -6.524073 | -4.356002 | 0.232890  |
| 109 | 6 | 0 | -5.629357 | -2.407294 | 0.002387  |
| 110 | 6 | 0 | -5.755839 | -1.937467 | 1.411578  |
| 111 | 6 | 0 | -6.544357 | -2.573801 | 2.371557  |
| 112 | 1 | 0 | -7.121965 | -3.452600 | 2.109670  |
| 113 | 6 | 0 | -6.594059 | -2.049467 | 3.656732  |
| 114 | 1 | 0 | -7.203500 | -2.528218 | 4.416941  |
| 115 | 6 | 0 | -5.865950 | -0.900850 | 3.955997  |
| 116 | 1 | 0 | -5.885671 | -0.459187 | 4.945639  |
| 117 | 6 | 0 | -5.112266 | -0.321030 | 2.942001  |
| 118 | 1 | 0 | -4.529993 | 0.583764  | 3.101734  |

---

**SCF=XQC**

|                                              |              |
|----------------------------------------------|--------------|
| Zero-point correction=                       | 0.920712     |
| (Hartree/Particle)                           |              |
| Thermal correction to Energy=                | 0.980321     |
| Thermal correction to Enthalpy=              | 0.981265     |
| Thermal correction to Gibbs Free Energy=     | 0.824430     |
| Sum of electronic and zero-point Energies=   | -3306.557731 |
| Sum of electronic and thermal Energies=      | -3306.498122 |
| Sum of electronic and thermal Enthalpies=    | -3306.497178 |
| Sum of electronic and thermal Free Energies= | -3306.654013 |

**Dimer singlet with two quintet subunits**

## Standard orientation:

| Center<br>Number | Atomic<br>Number | Atomic<br>Type | Coordinates (Angstroms) |           |           |
|------------------|------------------|----------------|-------------------------|-----------|-----------|
|                  |                  |                | X                       | Y         | Z         |
| 1                | 28               | 0              | 4.553982                | 0.006590  | 0.068851  |
| 2                | 7                | 0              | 5.886606                | -0.186782 | 1.717490  |
| 3                | 7                | 0              | 5.562453                | -1.696617 | -0.390120 |
| 4                | 7                | 0              | 3.708053                | -0.621132 | -1.859383 |
| 5                | 7                | 0              | 2.758635                | -0.608730 | 1.039322  |
| 6                | 7                | 0              | 3.580622                | 1.771049  | 0.337879  |
| 7                | 7                | 0              | 5.875978                | 1.495668  | -0.857824 |
| 8                | 6                | 0              | 5.976575                | 0.632013  | 2.768758  |
| 9                | 1                | 0              | 5.255346                | 1.448104  | 2.779695  |
| 10               | 6                | 0              | 6.904322                | 0.480022  | 3.782959  |
| 11               | 1                | 0              | 6.932544                | 1.172045  | 4.615537  |
| 12               | 6                | 0              | 7.800609                | -0.606599 | 3.689214  |
| 13               | 1                | 0              | 8.547114                | -0.767396 | 4.461435  |
| 14               | 6                | 0              | 7.726314                | -1.463908 | 2.619423  |
| 15               | 1                | 0              | 8.409541                | -2.303150 | 2.542188  |
| 16               | 6                | 0              | 6.749733                | -1.252851 | 1.610736  |
| 17               | 6                | 0              | 6.579802                | -2.080409 | 0.456293  |
| 18               | 6                | 0              | 7.346894                | -3.223921 | 0.115735  |
| 19               | 1                | 0              | 8.151455                | -3.550946 | 0.766538  |
| 20               | 6                | 0              | 7.074244                | -3.916330 | -1.037745 |
| 21               | 1                | 0              | 7.662407                | -4.789354 | -1.300366 |
| 22               | 6                | 0              | 6.021022                | -3.490539 | -1.897166 |
| 23               | 1                | 0              | 5.811588                | -4.020733 | -2.818031 |
| 24               | 6                | 0              | 5.301615                | -2.377053 | -1.520308 |
| 25               | 6                | 0              | 4.173674                | -1.802479 | -2.305871 |
| 26               | 6                | 0              | 3.594445                | -2.427465 | -3.412303 |
| 27               | 1                | 0              | 3.965422                | -3.386468 | -3.754780 |
| 28               | 6                | 0              | 2.519153                | -1.819094 | -4.047319 |
| 29               | 1                | 0              | 2.047294                | -2.299510 | -4.898585 |
| 30               | 6                | 0              | 2.045287                | -0.597630 | -3.574077 |
| 31               | 1                | 0              | 1.196519                | -0.097416 | -4.026515 |
| 32               | 6                | 0              | 2.681695                | -0.036333 | -2.474071 |
| 33               | 1                | 0              | 2.360005                | 0.911500  | -2.047582 |
| 34               | 6                | 0              | 2.397620                | -1.863342 | 1.327188  |
| 35               | 1                | 0              | 3.130696                | -2.624353 | 1.062579  |
| 36               | 6                | 0              | 1.191563                | -2.200012 | 1.912687  |
| 37               | 1                | 0              | 0.938438                | -3.234521 | 2.109564  |
| 38               | 6                | 0              | 0.301281                | -1.149044 | 2.228869  |
| 39               | 1                | 0              | -0.665707               | -1.369469 | 2.673575  |
| 40               | 6                | 0              | 0.658091                | 0.148629  | 1.956999  |
| 41               | 1                | 0              | -0.014079               | 0.969506  | 2.187767  |
| 42               | 6                | 0              | 1.905384                | 0.427478  | 1.336395  |
| 43               | 6                | 0              | 2.348566                | 1.731454  | 0.952047  |
| 44               | 6                | 0              | 1.637673                | 2.948394  | 1.122801  |
| 45               | 1                | 0              | 0.660054                | 2.945134  | 1.594630  |
| 46               | 6                | 0              | 2.173766                | 4.125241  | 0.664287  |
| 47               | 1                | 0              | 1.629559                | 5.055903  | 0.787836  |
| 48               | 6                | 0              | 3.443605                | 4.132005  | 0.017425  |
| 49               | 1                | 0              | 3.863626                | 5.056967  | -0.357497 |
| 50               | 6                | 0              | 4.099476                | 2.926263  | -0.114099 |
| 51               | 6                | 0              | 5.432322                | 2.762389  | -0.761833 |
| 52               | 6                | 0              | 6.200564                | 3.827003  | -1.238166 |
| 53               | 1                | 0              | 5.840176                | 4.845055  | -1.149565 |
| 54               | 6                | 0              | 7.435175                | 3.564060  | -1.816198 |
| 55               | 1                | 0              | 8.045717                | 4.380492  | -2.189327 |
| 56               | 6                | 0              | 7.883861                | 2.248534  | -1.905031 |

|     |    |   |           |           |           |
|-----|----|---|-----------|-----------|-----------|
| 57  | 1  | 0 | 8.844469  | 2.005226  | -2.344184 |
| 58  | 6  | 0 | 7.063762  | 1.243966  | -1.406341 |
| 59  | 1  | 0 | 7.353966  | 0.195704  | -1.434212 |
| 60  | 28 | 0 | -4.574496 | -0.127294 | -0.116212 |
| 61  | 7  | 0 | -3.313325 | -1.843324 | -0.190978 |
| 62  | 7  | 0 | -2.822686 | 0.658188  | -0.782535 |
| 63  | 7  | 0 | -5.007654 | 2.018192  | -0.360222 |
| 64  | 7  | 0 | -5.837176 | -0.608304 | -1.758832 |
| 65  | 7  | 0 | -6.299132 | -0.673775 | 0.812476  |
| 66  | 7  | 0 | -4.127834 | 0.092852  | 2.022442  |
| 67  | 6  | 0 | -3.655993 | -3.102283 | 0.095103  |
| 68  | 1  | 0 | -4.707651 | -3.250308 | 0.335984  |
| 69  | 6  | 0 | -2.763210 | -4.158549 | 0.093892  |
| 70  | 1  | 0 | -3.094203 | -5.161687 | 0.333412  |
| 71  | 6  | 0 | -1.418981 | -3.877359 | -0.233659 |
| 72  | 1  | 0 | -0.680575 | -4.674171 | -0.249300 |
| 73  | 6  | 0 | -1.042756 | -2.591466 | -0.536349 |
| 74  | 1  | 0 | -0.010898 | -2.366114 | -0.785039 |
| 75  | 6  | 0 | -2.007948 | -1.551309 | -0.508925 |
| 76  | 6  | 0 | -1.728282 | -0.178471 | -0.800901 |
| 77  | 6  | 0 | -0.450095 | 0.375892  | -1.061743 |
| 78  | 1  | 0 | 0.427965  | -0.262948 | -1.054277 |
| 79  | 6  | 0 | -0.318043 | 1.728192  | -1.264241 |
| 80  | 1  | 0 | 0.659738  | 2.170038  | -1.429684 |
| 81  | 6  | 0 | -1.460435 | 2.576728  | -1.189855 |
| 82  | 1  | 0 | -1.352955 | 3.649753  | -1.293730 |
| 83  | 6  | 0 | -2.681698 | 1.986311  | -0.942705 |
| 84  | 6  | 0 | -3.958097 | 2.739341  | -0.795568 |
| 85  | 6  | 0 | -4.095064 | 4.098191  | -1.088252 |
| 86  | 1  | 0 | -3.248373 | 4.665591  | -1.456744 |
| 87  | 6  | 0 | -5.331922 | 4.704990  | -0.916991 |
| 88  | 1  | 0 | -5.456527 | 5.759953  | -1.140966 |
| 89  | 6  | 0 | -6.409906 | 3.946908  | -0.465359 |
| 90  | 1  | 0 | -7.391935 | 4.383881  | -0.326144 |
| 91  | 6  | 0 | -6.196712 | 2.599068  | -0.203568 |
| 92  | 1  | 0 | -6.995210 | 1.944606  | 0.140411  |
| 93  | 6  | 0 | -5.510290 | -0.570412 | -3.053034 |
| 94  | 1  | 0 | -4.476862 | -0.295026 | -3.257376 |
| 95  | 6  | 0 | -6.394502 | -0.854809 | -4.077472 |
| 96  | 1  | 0 | -6.075787 | -0.811209 | -5.111662 |
| 97  | 6  | 0 | -7.715599 | -1.203337 | -3.720159 |
| 98  | 1  | 0 | -8.446904 | -1.434409 | -4.489292 |
| 99  | 6  | 0 | -8.075627 | -1.252141 | -2.396512 |
| 100 | 1  | 0 | -9.087482 | -1.523708 | -2.114857 |
| 101 | 6  | 0 | -7.118862 | -0.950828 | -1.391261 |
| 102 | 6  | 0 | -7.380327 | -0.974914 | 0.014457  |
| 103 | 6  | 0 | -8.622543 | -1.259917 | 0.639109  |
| 104 | 1  | 0 | -9.489804 | -1.509712 | 0.036531  |
| 105 | 6  | 0 | -8.729534 | -1.213364 | 2.006362  |
| 106 | 1  | 0 | -9.679947 | -1.425469 | 2.485019  |
| 107 | 6  | 0 | -7.597548 | -0.879124 | 2.804133  |
| 108 | 1  | 0 | -7.681933 | -0.820477 | 3.882225  |
| 109 | 6  | 0 | -6.411064 | -0.621614 | 2.150771  |
| 110 | 6  | 0 | -5.139006 | -0.255776 | 2.837068  |
| 111 | 6  | 0 | -4.963618 | -0.280906 | 4.222621  |
| 112 | 1  | 0 | -5.779248 | -0.575421 | 4.872506  |
| 113 | 6  | 0 | -3.724861 | 0.055281  | 4.753243  |
| 114 | 1  | 0 | -3.569603 | 0.034228  | 5.827416  |
| 115 | 6  | 0 | -2.683816 | 0.406236  | 3.896273  |
| 116 | 1  | 0 | -1.697270 | 0.659022  | 4.270562  |
| 117 | 6  | 0 | -2.938006 | 0.409501  | 2.529632  |

118 1 0 -2.170570 0.656937 1.797989  
-----

**SCF=QC**

Energy= -3307.488473

**SCF=XQC**

|                                              |              |
|----------------------------------------------|--------------|
| Zero-point correction=                       | 0.919186     |
| (Hartree/Particle)                           |              |
| Thermal correction to Energy=                | 0.979574     |
| Thermal correction to Enthalpy=              | 0.980518     |
| Thermal correction to Gibbs Free Energy=     | 0.817366     |
| Sum of electronic and zero-point Energies=   | -3306.565765 |
| Sum of electronic and thermal Energies=      | -3306.505377 |
| Sum of electronic and thermal Enthalpies=    | -3306.504433 |
| Sum of electronic and thermal Free Energies= | -3306.667585 |
